# Supplementary material for: Genome-Wide Identification of Alternative Splice Forms Down-Regulated by Nonsense-Mediated mRNA Decay in Drosophila
Source: PubMed Central journal article supplement (PMC2689934; doi:10.1371/journal.pgen.1000525), 2009-06-19
Supplement: pgen.1000525.s001.pdf [file pgen.1000525.s001.pdf]

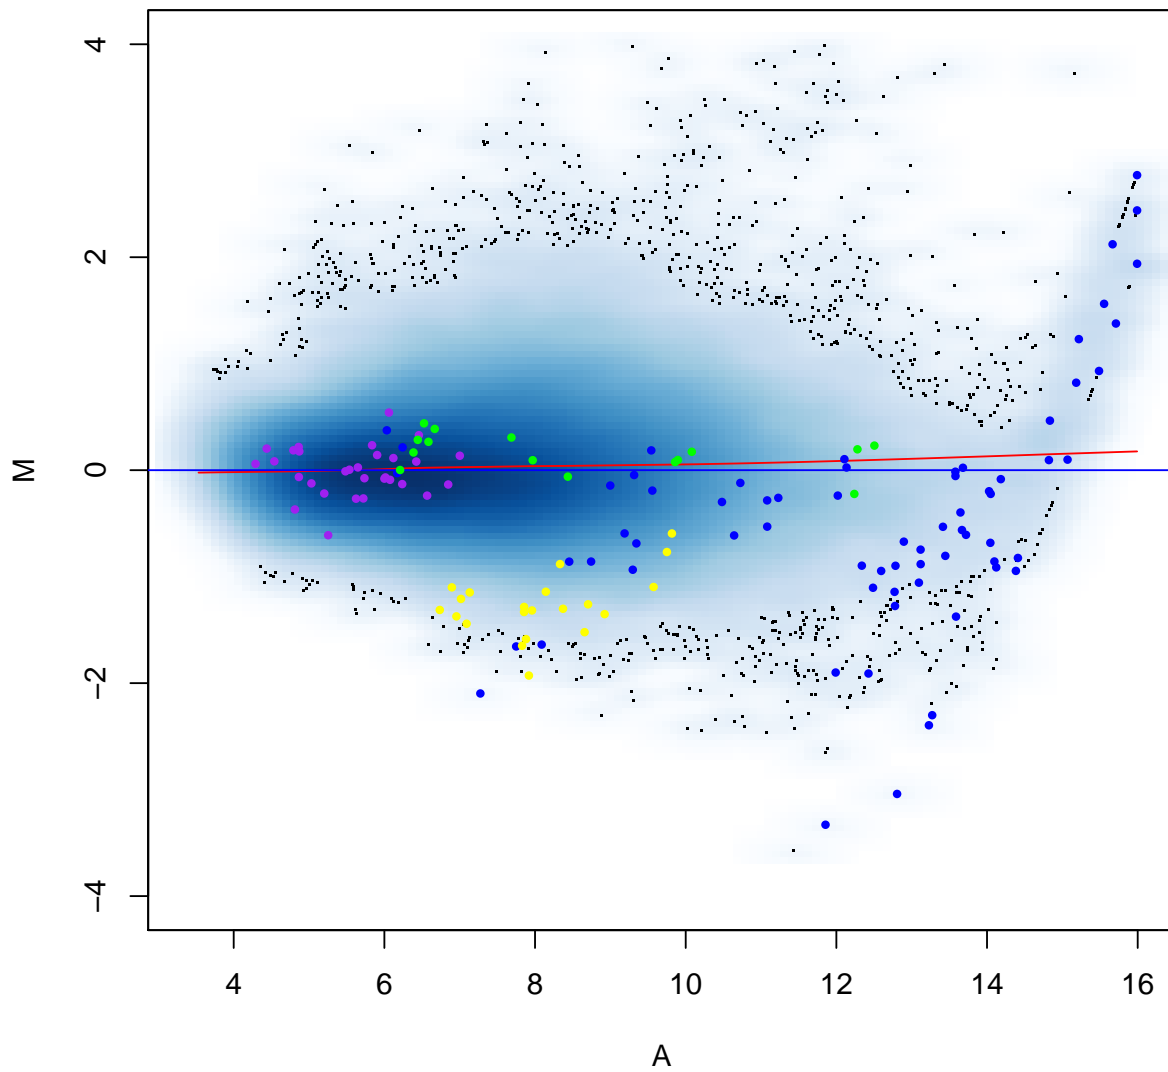

**Figure S1. Overlaid MA plots for *upf1*.** MA plot of the 3 normalized *upf1* arrays. The three arrays have been superimposed on the same plot. The red line is a lowess line, and the blue line is  $M = 0$ . The yellow/green points are probes targeting *upf1/upf2* and the blue/purple points are positive (present)/negative (absent) control probes.
