# Supplementary material for: Genome-Wide Identification of Alternative Splice Forms Down-Regulated by Nonsense-Mediated mRNA Decay in Drosophila
Source: PubMed Central journal article supplement (PMC2689934; doi:10.1371/journal.pgen.1000525), 2009-06-19
Supplement: pgen.1000525.s003.pdf [file pgen.1000525.s003.pdf]

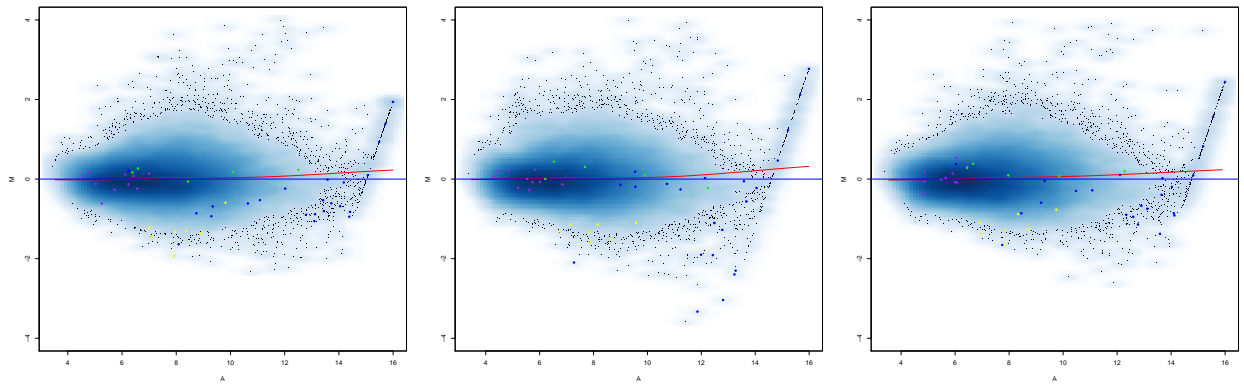

**Figure S3. Individual MA plots for *upf1*.** MA plots of the 3 normalized *upf1* arrays side by side. Lines and colorscheme are as in Figure S1.
