# Supplementary material for: Genome-Wide Identification of Alternative Splice Forms Down-Regulated by Nonsense-Mediated mRNA Decay in Drosophila
Source: PubMed Central journal article supplement (PMC2689934; doi:10.1371/journal.pgen.1000525), 2009-06-19
Supplement: pgen.1000525.s014.pdf [file pgen.1000525.s014.pdf]

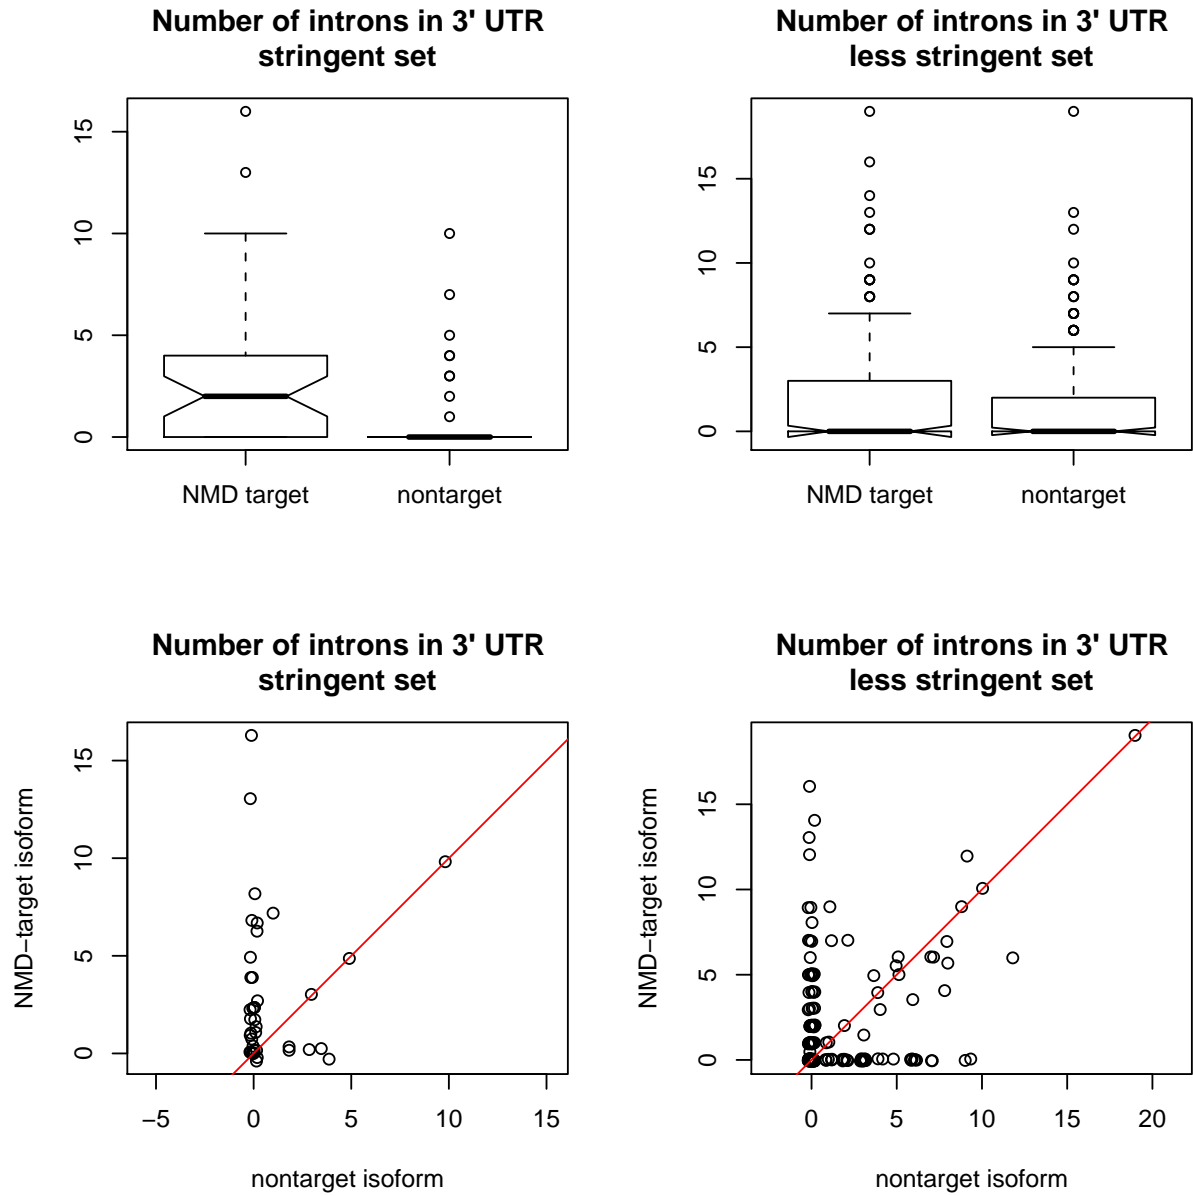

**Figure S14. Number of introns in 3' UTR.** As Figure S9 for the feature “number of introns in 3' UTR.” Both the bottom right and the bottom left scatterplots has been jittered.
