# Supplementary material for: Genome-Wide Identification of Alternative Splice Forms Down-Regulated by Nonsense-Mediated mRNA Decay in Drosophila
Source: PubMed Central journal article supplement (PMC2689934; doi:10.1371/journal.pgen.1000525), 2009-06-19
Supplement: pgen.1000525.s017.pdf [file pgen.1000525.s017.pdf]

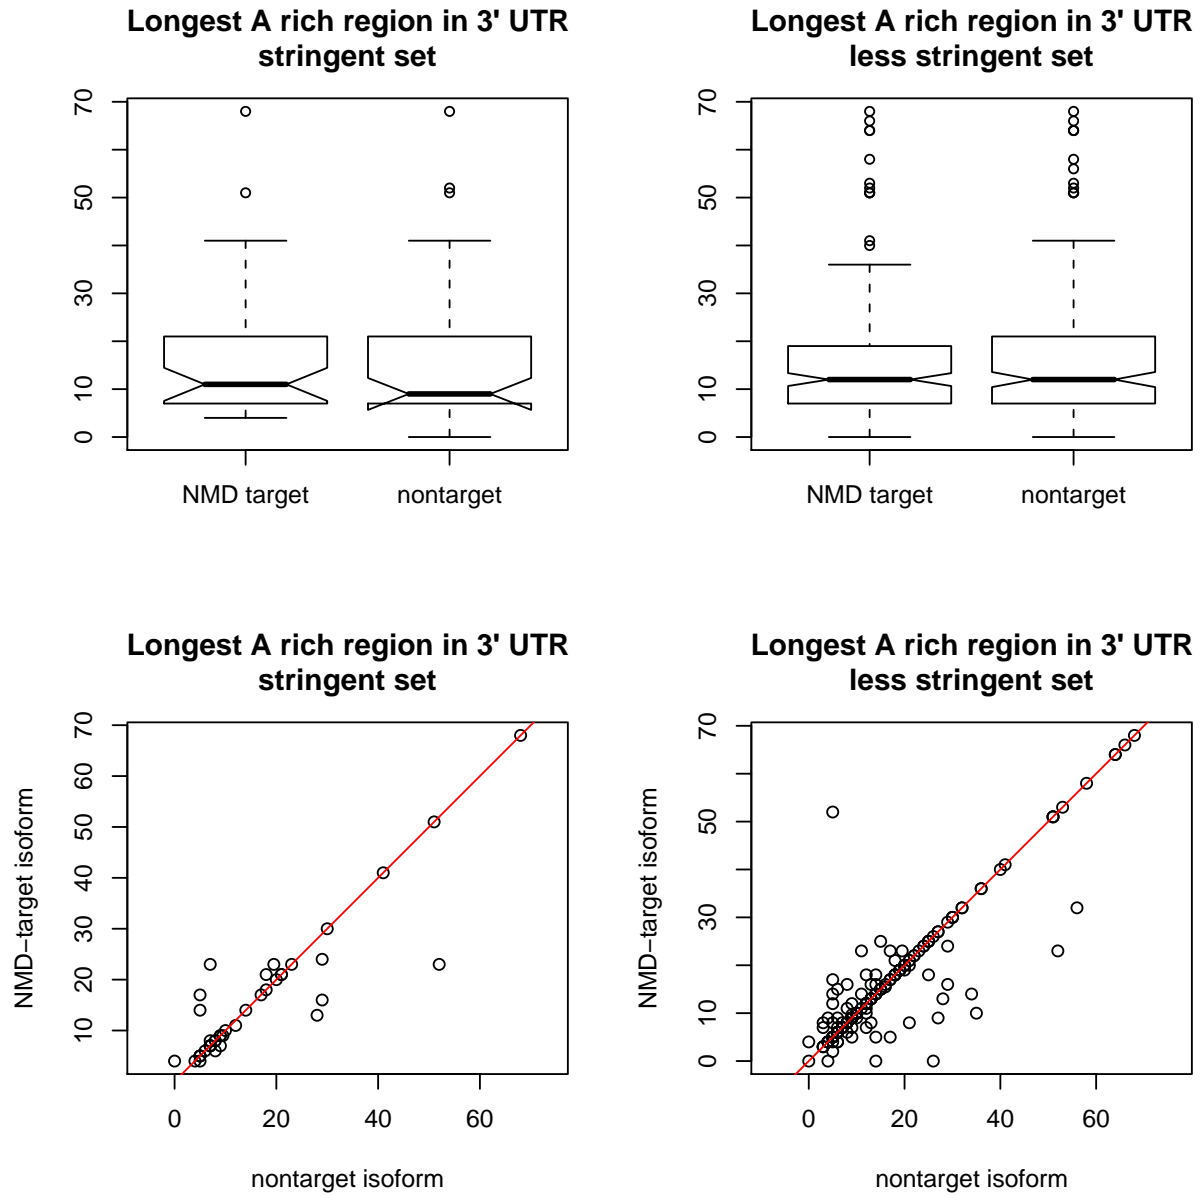

**Figure S17. Length of longest A-rich region in 3' UTR.** As Figure S9 for the feature “length of longest A-rich region in 3' UTR.”
