# Supplementary material for: Genome-Wide Identification of Alternative Splice Forms Down-Regulated by Nonsense-Mediated mRNA Decay in Drosophila
Source: PubMed Central journal article supplement (PMC2689934; doi:10.1371/journal.pgen.1000525), 2009-06-19
Supplement: pgen.1000525.s021.pdf [file pgen.1000525.s021.pdf]

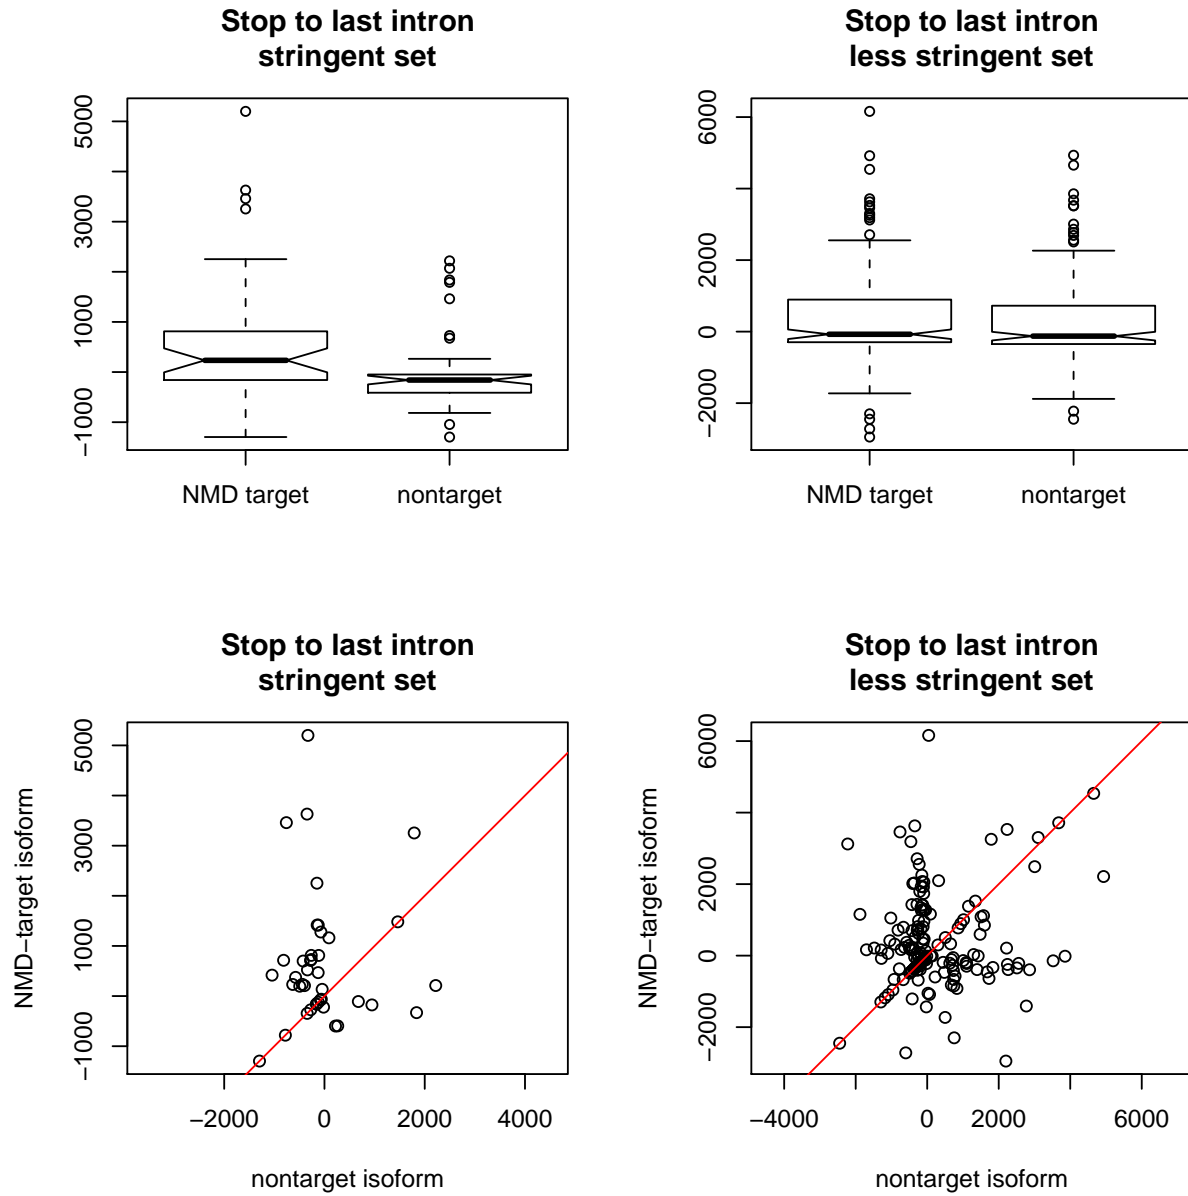

**Figure S21. Distance from stop codon to final intron.** As Figure S9 for the feature “distance from stop codon to final intron.” CG11100 did not have any introns and is not assigned a value.
