# Supplementary material for: Genome-Wide Identification of Alternative Splice Forms Down-Regulated by Nonsense-Mediated mRNA Decay in Drosophila
Source: PubMed Central journal article supplement (PMC2689934; doi:10.1371/journal.pgen.1000525), 2009-06-19
Supplement: pgen.1000525.s022.pdf [file pgen.1000525.s022.pdf]

a. 3' UTRs of all NMD-target mRNAs

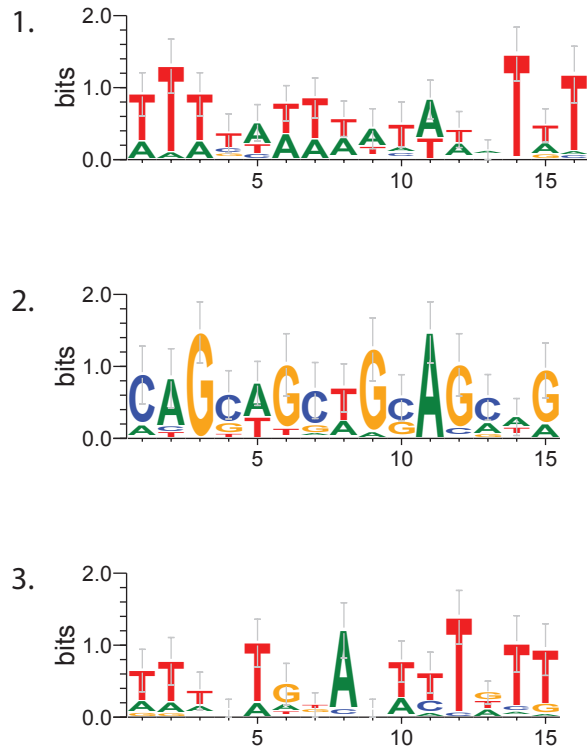

b. 3' UTRs of NMD-target mRNAs with early stop codons

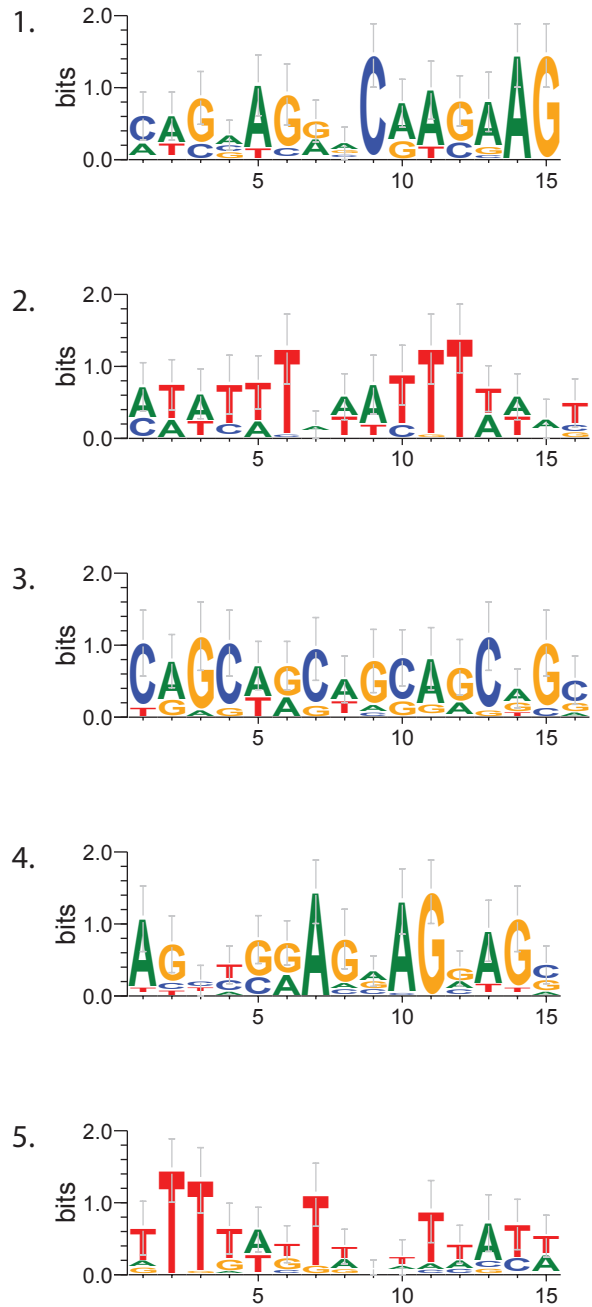

**Figure S22. Motifs found by MEME.** a. Overrepresented motifs found in the 3' UTRs of NMD-target mRNAs. MEME was used to search for motifs with a width of 6-16 nt occurring zero or one times per sequence. All motifs appear to be repetitive sequence. b. Overrepresented motifs found in the 3' UTRs of the 27 NMD-target mRNAs with an early stop codon. Motifs 2, 3, and 5 match the motifs in (a); motifs 1 and 4 appear similar to known RARRAR splicing enhancers.
