# Supplementary material for: Genome-Wide Identification of Alternative Splice Forms Down-Regulated by Nonsense-Mediated mRNA Decay in Drosophila
Source: PubMed Central journal article supplement (PMC2689934; doi:10.1371/journal.pgen.1000525), 2009-06-19
Supplement: pgen.1000525.s023.pdf [file pgen.1000525.s023.pdf]

**Table S1. Number of AUG (start) codons in 5' UTR**

| (a) Stringent set |            |               | (b) Less stringent set |            |               | (c) Stringent set |    |   |   |   |   |   |  |
|-------------------|------------|---------------|------------------------|------------|---------------|-------------------|----|---|---|---|---|---|--|
| value             | NMD target | NMD nontarget | value                  | NMD target | NMD nontarget | NMD nontarget     |    |   |   |   |   |   |  |
| 0                 | 29         | 30            | 0                      | 119        | 122           | 0                 | 1  | 2 | 3 | 5 | 6 |   |  |
| 1                 | 8          | 7             | 1                      | 42         | 37            | 0                 | 25 | 1 | 0 | 1 | 1 | 1 |  |
| 2                 | 2          | 2             | 2                      | 10         | 8             | 1                 | 1  | 6 | 0 | 1 | 0 | 0 |  |
| 3                 | 1          | 2             | 3                      | 13         | 10            | 2                 | 0  | 0 | 2 | 0 | 0 | 0 |  |
| 5                 | 1          | 2             | 4                      | 1          | 5             | 3                 | 1  | 0 | 0 | 0 | 0 | 0 |  |
| 6                 | 0          | 1             | 5                      | 7          | 6             | 5                 | 0  | 0 | 0 | 0 | 1 | 0 |  |
|                   |            |               | 6                      | 1          | 1             |                   |    |   |   |   |   |   |  |
|                   |            |               | 7                      | 2          | 4             |                   |    |   |   |   |   |   |  |
|                   |            |               | 8                      | 1          | 1             |                   |    |   |   |   |   |   |  |
|                   |            |               | 9                      | 0          | 2             |                   |    |   |   |   |   |   |  |
|                   |            |               | 11                     | 1          | 0             |                   |    |   |   |   |   |   |  |
|                   |            |               | 12                     | 1          | 1             |                   |    |   |   |   |   |   |  |
|                   |            |               | 15                     | 0          | 1             |                   |    |   |   |   |   |   |  |

  

| (d) Less stringent set |               |    |     |   |   |   |     |   |   |   |   |    |    |
|------------------------|---------------|----|-----|---|---|---|-----|---|---|---|---|----|----|
|                        | NMD nontarget |    |     |   |   |   |     |   |   |   |   |    |    |
|                        | 0             | 1  | 1.5 | 2 | 3 | 4 | 4.5 | 5 | 6 | 7 | 9 | 12 | 15 |
| 0                      | 93            | 7  | 0   | 0 | 0 | 2 | 1   | 1 | 1 | 2 | 1 | 0  | 1  |
| 0.5                    | 0             | 1  | 0   | 0 | 0 | 0 | 0   | 0 | 0 | 0 | 0 | 0  | 0  |
| 0.67                   | 1             | 0  | 0   | 0 | 0 | 0 | 0   | 0 | 0 | 0 | 0 | 0  | 0  |
| 1                      | 7             | 25 | 0   | 1 | 2 | 1 | 0   | 0 | 0 | 0 | 0 | 0  | 0  |
| 2                      | 0             | 2  | 0   | 5 | 2 | 0 | 0   | 0 | 0 | 0 | 0 | 0  | 0  |
| 3                      | 3             | 1  | 1   | 3 | 3 | 0 | 0   | 1 | 0 | 0 | 0 | 0  | 0  |
| 4                      | 0             | 0  | 0   | 0 | 0 | 1 | 0   | 0 | 0 | 0 | 0 | 0  | 0  |
| 5                      | 1             | 1  | 0   | 0 | 0 | 1 | 0   | 4 | 0 | 0 | 0 | 0  | 0  |
| 6                      | 1             | 0  | 0   | 0 | 0 | 0 | 0   | 0 | 0 | 0 | 0 | 0  | 0  |
| 7                      | 0             | 0  | 0   | 0 | 0 | 0 | 0   | 0 | 0 | 2 | 0 | 0  | 0  |
| 8                      | 0             | 0  | 0   | 0 | 0 | 1 | 0   | 0 | 0 | 0 | 0 | 0  | 0  |
| 11.5                   | 0             | 0  | 0   | 0 | 0 | 0 | 0   | 0 | 0 | 0 | 0 | 1  | 0  |

Tables (a) and (b) show an unpaired comparison between the NMD-target mRNAs and the NMD nontarget mRNAs for the stringent and the less stringent set of *upf1*-affected genes, for the feature “number of AUG (start) codons in 5' UTR.” Tables (c) and (d) show a paired comparison between the two sets of mRNAs, for the stringent and the less stringent set of genes.
