# Supplementary material for: Genome-Wide Identification of Alternative Splice Forms Down-Regulated by Nonsense-Mediated mRNA Decay in Drosophila
Source: PubMed Central journal article supplement (PMC2689934; doi:10.1371/journal.pgen.1000525), 2009-06-19
Supplement: pgen.1000525.s025.pdf [file pgen.1000525.s025.pdf]

**Table S3. GO terms enriched in stringent *upf1* set**

| GO Term                                                                    | P-value | Genes                                                                              |
|----------------------------------------------------------------------------|---------|------------------------------------------------------------------------------------|
| Biological Process                                                         |         |                                                                                    |
| GO:0006412 translation                                                     | 0.0009  | RpL10Ab glo RpL8 RpS15 sqd RpL34b sta                                              |
| GO:0051231 spindle elongation                                              | 0.0031  | RpL10Ab RpL8 RpS15 sta                                                             |
| GO:0000022 mitotic spindle elongation                                      | 0.0031  | RpL10Ab RpL8 RpS15 sta                                                             |
| GO:0044267 cellular protein metabolic process                              | 0.0038  | RpL10Ab glo RpL8 RpS15 CG3731 grass sqd RpL34b sta SNF4Agamma CG10107 Tao-1 CaMKII |
| GO:0019538 protein metabolic process                                       | 0.0040  | RpL10Ab glo RpL8 RpS15 CG3731 grass sqd RpL34b sta SNF4Agamma CG10107 Tao-1 CaMKII |
| GO:0007052 mitotic spindle organization                                    | 0.0041  | CG13900 RpL10Ab RpL8 RpS15 sta                                                     |
| GO:0000226 microtubule cytoskeleton organization                           | 0.0054  | CG13900 RpL10Ab RpL8 RpS15 sqd sta                                                 |
| GO:0007051 spindle organization                                            | 0.0086  | CG13900 RpL10Ab RpL8 RpS15 sta                                                     |
| Cellular Component                                                         |         |                                                                                    |
| GO:0022626 cytosolic ribosome                                              | 0.0005  | RpL10Ab RpL8 RpS15 RpL34b sta                                                      |
| GO:0030529 ribonucleoprotein complex                                       | 0.0006  | CG13900 RpL10Ab RpL8 RpS15 sqd RpL34b sta                                          |
| GO:0033279 ribosomal subunit                                               | 0.0009  | RpL10Ab RpL8 RpS15 RpL34b sta                                                      |
| GO:0005840 ribosome                                                        | 0.0010  | RpL10Ab RpL8 RpS15 RpL34b sta                                                      |
| GO:0044445 cytosolic part                                                  | 0.0012  | RpL10Ab RpL8 RpS15 RpL34b sta                                                      |
| GO:0033180 proton-transporting V-type ATPase, V1 domain                    | 0.0029  | Vha26 VhaSFD                                                                       |
| GO:0000221 vacuolar proton-transporting V-type ATPase, V1 domain           | 0.0029  | Vha26 VhaSFD                                                                       |
| GO:0022625 cytosolic large ribosomal subunit                               | 0.0045  | RpL10Ab RpL8 RpL34b                                                                |
| GO:0015934 large ribosomal subunit                                         | 0.0059  | RpL10Ab RpL8 RpL34b                                                                |
| GO:0033176 proton-transporting V-type ATPase complex                       | 0.0077  | Vha26 VhaSFD                                                                       |
| GO:0016471 vacuolar proton-transporting V-type ATPase complex              | 0.0077  | Vha26 VhaSFD                                                                       |
| GO:0033178 proton-transporting two-sector ATPase complex, catalytic domain | 0.0098  | Vha26 VhaSFD                                                                       |
| Molecular Function                                                         |         |                                                                                    |
| GO:0003735 structural constituent of ribosome                              | 0.0008  | RpL10Ab RpL8 RpS15 RpL34b sta                                                      |
| GO:0005198 structural molecule activity                                    | 0.0015  | RpL10Ab RpL8 RpS15 RpL34b CG4673 sta                                               |
