# Supplementary material for: Genome-Wide Identification of Alternative Splice Forms Down-Regulated by Nonsense-Mediated mRNA Decay in Drosophila
Source: PubMed Central journal article supplement (PMC2689934; doi:10.1371/journal.pgen.1000525), 2009-06-19
Supplement: pgen.1000525.s028.pdf [file pgen.1000525.s028.pdf]

**Table S6. *upf2* target genes, stringent set**

| gene ID | name      | transcript | NMD status      |
|---------|-----------|------------|-----------------|
| CG33206 | l(1)G0168 | CG33206-RB | target          |
|         |           | CG33206-RA | nontarget       |
| CG3321  |           | CG3321-RA  | target          |
|         |           | CG3321-RB  | nontarget       |
| CG3358  |           | CG3358-RA  | target          |
|         |           | CG3358-RB  | nontarget       |
| CG3629  | Dll       | CG3629-RB  | target          |
|         |           | CG3629-RA  | nontarget       |
| CG5215  | Zn72D     | CG5215-RA  | target          |
|         |           | CG5215-RB  | nontarget       |
| CG5896  | grass     | CG5896-RA  | target          |
|         |           | CG5896-RB  | nontarget       |
| CG6359  |           | CG6359-RA  | target          |
|         |           | CG6359-RB  | nontarget       |
| CG6454  |           | CG6454-RA  | target          |
|         |           | CG6454-RB  | nontarget       |
| CG7766  |           | CG7766-RA  | target          |
|         |           | CG7766-RB  | nontarget       |
| CG8332  | RpS15     | CG8332-RB  | target          |
|         |           | CG8332-RA  | nontarget       |
| CG8857  | RpS11     | CG8857-RB  | target          |
|         |           | CG8857-RA  | nontarget       |
| CG17077 | pnt       | CG17077-RB | target          |
|         |           | CG17077-RD | nontarget       |
|         |           | CG17077-RC | possibly absent |
| CG31332 | unc-115   | CG31332-RD | target          |
|         |           | CG31332-RB | nontarget       |
|         |           | CG31332-RC | nontarget       |
|         |           | CG31332-RA | possibly absent |
| CG32149 | RhoGAP71E | CG32149-RC | target          |
|         |           | CG32149-RB | nontarget       |
|         |           | CG32149-RA | possibly absent |
| CG33261 | Trl       | CG33261-RF | target          |
|         |           | CG33261-RA | nontarget       |
|         |           | CG33261-RB | possibly absent |
|         |           | CG33261-RC | possibly absent |
|         |           | CG33261-RD | possibly absent |
|         |           | CG33261-RE | possibly absent |
| CG3671  | Mvl       | CG3671-RB  | target          |
|         |           | CG3671-RA  | nontarget       |
|         |           | CG3671-RC  | possibly absent |
| CG4452  |           | CG4452-RB  | target          |
|         |           | CG4452-RA  | nontarget       |
|         |           | CG4452-RC  | nontarget       |
| CG6946  | glo       | CG6946-RC  | target          |
|         |           | CG6946-RA  | nontarget       |
|         |           | CG6946-RB  | possibly absent |

Set of NMD targets for *upf2*, using the stringent cutoff.
