# Supplementary material for: Genome-Wide Identification of Alternative Splice Forms Down-Regulated by Nonsense-Mediated mRNA Decay in Drosophila
Source: PubMed Central journal article supplement (PMC2689934; doi:10.1371/journal.pgen.1000525), 2009-06-19
Supplement: pgen.1000525.s029.pdf [file pgen.1000525.s029.pdf]

**Table S7. *upf1* target genes, less stringent set**

| gene ID | name     | transcript | NMD status |
|---------|----------|------------|------------|
| CG10079 | Egfr     | CG10079-RB | target     |
|         |          | CG10079-RA | nontarget  |
| CG10126 |          | CG10126-RA | target     |
|         |          | CG10126-RB | nontarget  |
| CG10371 | Plip     | CG10371-RA | target     |
|         |          | CG10371-RB | nontarget  |
| CG10494 |          | CG10494-RB | target     |
|         |          | CG10494-RA | nontarget  |
| CG10699 | Lim3     | CG10699-RB | target     |
|         |          | CG10699-RA | nontarget  |
| CG1088  | Vha26    | CG1088-RB  | target     |
|         |          | CG1088-RA  | nontarget  |
| CG10901 | osk      | CG10901-RA | target     |
|         |          | CG10901-RB | nontarget  |
| CG1104  |          | CG1104-RA  | target     |
|         |          | CG1104-RB  | nontarget  |
| CG11760 |          | CG11760-RA | target     |
|         |          | CG11760-RB | nontarget  |
| CG11779 |          | CG11779-RA | target     |
|         |          | CG11779-RB | nontarget  |
| CG1200  | Aplip1   | CG1200-RB  | target     |
|         |          | CG1200-RA  | nontarget  |
| CG12101 | Hsp60    | CG12101-RA | target     |
|         |          | CG12101-RB | nontarget  |
| CG12134 |          | CG12134-RB | target     |
|         |          | CG12134-RA | nontarget  |
| CG1233  |          | CG1233-RA  | target     |
|         |          | CG1233-RB  | nontarget  |
| CG12342 | dgo      | CG12342-RA | target     |
|         |          | CG12342-RB | nontarget  |
| CG1263  | RpL8     | CG1263-RB  | target     |
|         |          | CG1263-RA  | nontarget  |
| CG12891 | CPTI     | CG12891-RB | target     |
|         |          | CG12891-RA | nontarget  |
| CG13204 |          | CG13204-RB | target     |
|         |          | CG13204-RA | nontarget  |
| CG1338  | hydra    | CG1338-RA  | target     |
|         |          | CG1338-RB  | nontarget  |
| CG13521 | robo     | CG13521-RA | target     |
|         |          | CG13521-RB | nontarget  |
| CG1362  | cdc2rk   | CG1362-RA  | target     |
|         |          | CG1362-RB  | nontarget  |
| CG13900 |          | CG13900-RA | target     |
|         |          | CG13900-RB | nontarget  |
| CG13923 |          | CG12022-RA | target     |
|         |          | CG13923-RA | nontarget  |
| CG14444 | APC7     | CG14444-RB | target     |
|         |          | CG14444-RA | nontarget  |
| CG1462  | Aph-4    | CG1462-RB  | target     |
|         |          | CG1462-RA  | nontarget  |
| CG1486  |          | CG1486-RB  | target     |
|         |          | CG1486-RA  | nontarget  |
| CG1488  | Cyp311a1 | CG1488-RB  | target     |
|         |          | CG1488-RA  | nontarget  |
| CG15117 |          | CG15117-RA | target     |
|         |          | CG15117-RB | nontarget  |
| CG15626 |          | CG15626-RB | target     |
|         |          | CG15626-RA | nontarget  |
| CG15881 |          | CG15881-RB | target     |
|         |          | CG15881-RA | nontarget  |
| CG1648  |          | CG1648-RA  | target     |

Continued on next page

Table S7 – continued from previous page

| gene ID | name         | transcript | NMD status |
|---------|--------------|------------|------------|
| CG16718 |              | CG1648-RB  | nontarget  |
|         |              | CG16718-RB | target     |
|         |              | CG16718-RA | nontarget  |
| CG17035 | GXIVsPLA2    | CG17035-RB | target     |
|         |              | CG17035-RA | nontarget  |
| CG18009 | Trf2         | CG18009-RA | target     |
|         |              | CG18009-RD | nontarget  |
| CG1866  | Moca-cyp     | CG1866-RB  | target     |
|         |              | CG1866-RA  | nontarget  |
| CG1902  |              | CG1902-RC  | target     |
| CG2152  | Pcmt         | CG1902-RA  | nontarget  |
|         |              | CG2152-RB  | target     |
|         |              | CG2152-RA  | nontarget  |
| CG2177  |              | CG2177-RB  | target     |
| CG2179  | Xe7          | CG2177-RA  | nontarget  |
|         |              | CG2179-RA  | target     |
|         |              | CG2179-RB  | nontarget  |
| CG30015 |              | CG30015-RA | target     |
|         |              | CG30015-RB | nontarget  |
| CG31751 |              | CG31751-RB | target     |
|         |              | CG31751-RA | nontarget  |
|         |              | CG3182-RB  | target     |
| CG3182  | sei          | CG3182-RA  | nontarget  |
|         |              | CG31961-RA | target     |
| CG31961 |              | CG31961-RB | nontarget  |
|         |              | CG32140-RB | target     |
|         |              | CG32140-RA | nontarget  |
| CG3217  | CkIIalpha-i3 | CG3217-RB  | target     |
|         |              | CG3217-RA  | nontarget  |
| CG3241  | msl-2        | CG3241-RB  | target     |
|         |              | CG3241-RA  | nontarget  |
| CG32647 |              | CG32647-RA | target     |
|         |              | CG32647-RB | nontarget  |
| CG33085 |              | CG33085-RD | target     |
|         |              | CG33085-RA | nontarget  |
| CG33206 | l(1)G0168    | CG33206-RB | target     |
|         |              | CG33206-RA | nontarget  |
|         |              | CG3358-RA  | target     |
| CG3358  |              | CG3358-RB  | nontarget  |
|         |              | CG3530-RB  | target     |
| CG3530  |              | CG3530-RA  | nontarget  |
|         |              | CG3629-RB  | target     |
|         |              | CG3629-RA  | nontarget  |
| CG3629  | Dll          | CG3731-RA  | target     |
|         |              | CG3731-RB  | nontarget  |
| CG3731  |              | CG3861-RA  | target     |
|         |              | CG3861-RB  | nontarget  |
| CG3861  | kdn          | CG4059-RA  | target     |
|         |              | CG4059-RB  | nontarget  |
| CG4059  | ftz-f1       | CG4070-RB  | target     |
|         |              | CG4070-RA  | nontarget  |
| CG4070  | Tis11        | CG4143-RB  | target     |
|         |              | CG4143-RA  | nontarget  |
| CG4143  | mbf1         | CG4247-RB  | target     |
|         |              | CG4247-RA  | nontarget  |
| CG4247  | mRpS10       | CG4590-RB  | target     |
|         |              | CG4590-RA  | nontarget  |
| CG4590  | inx2         | CG4609-RA  | target     |
|         |              | CG4609-RB  | nontarget  |
| CG4609  | fax          | CG4673-RB  | target     |
|         |              | CG4673-RA  | nontarget  |
| CG4673  |              | CG4673-RB  | target     |
|         |              | CG4673-RA  | nontarget  |

Continued on next page

Table S7 – continued from previous page

| gene ID | name         | transcript | NMD status |
|---------|--------------|------------|------------|
| CG4712  |              | CG4712-RB  | target     |
|         |              | CG4712-RA  | nontarget  |
| CG4795  | Cpn          | CG4795-RB  | target     |
|         |              | CG4795-RA  | nontarget  |
| CG5081  | Syx7         | CG5081-RA  | target     |
|         |              | CG5081-RB  | nontarget  |
| CG5215  | Zn72D        | CG5215-RA  | target     |
|         |              | CG5215-RB  | nontarget  |
| CG5326  |              | CG5326-RB  | target     |
|         |              | CG5326-RA  | nontarget  |
| CG5394  | Aats-glupro  | CG5394-RA  | target     |
|         |              | CG5394-RB  | nontarget  |
| CG5613  |              | CG5613-RB  | target     |
|         |              | CG5613-RA  | nontarget  |
| CG5625  |              | CG5625-RA  | target     |
|         |              | CG5625-RB  | nontarget  |
| CG5729  | Dgp-1        | CG5729-RB  | target     |
|         |              | CG5729-RA  | nontarget  |
| CG5785  | thr          | CG5785-RB  | target     |
|         |              | CG5785-RA  | nontarget  |
| CG5854  |              | CG5854-RA  | target     |
|         |              | CG5854-RB  | nontarget  |
| CG5896  | grass        | CG5896-RA  | target     |
|         |              | CG5896-RB  | nontarget  |
| CG6023  |              | CG6023-RB  | target     |
|         |              | CG6023-RA  | nontarget  |
| CG6084  |              | CG6084-RB  | target     |
|         |              | CG6084-RA  | nontarget  |
| CG6090  | RpL34a       | CG6090-RB  | target     |
|         |              | CG6090-RA  | nontarget  |
| CG6297  | JIL-1        | CG6297-RA  | target     |
|         |              | CG6297-RB  | nontarget  |
| CG6315  | fl(2)d       | CG6315-RB  | target     |
|         |              | CG6315-RA  | nontarget  |
| CG6454  |              | CG6454-RA  | target     |
|         |              | CG6454-RB  | nontarget  |
| CG6608  |              | CG6608-RB  | target     |
|         |              | CG6608-RA  | nontarget  |
| CG6726  |              | CG6726-RA  | target     |
|         |              | CG6726-RB  | nontarget  |
| CG6767  |              | CG6767-RA  | target     |
|         |              | CG6767-RB  | nontarget  |
| CG6798  | nAcRbeta-96A | CG6798-RA  | target     |
|         |              | CG6798-RB  | nontarget  |
| CG6829  | Ark          | CG6829-RB  | target     |
|         |              | CG6829-RA  | nontarget  |
| CG6891  |              | CG6891-RB  | target     |
|         |              | CG6891-RA  | nontarget  |
| CG7070  | PyK          | CG7070-RB  | target     |
|         |              | CG7070-RA  | nontarget  |
| CG7263  |              | CG7263-RA  | target     |
|         |              | CG7263-RB  | nontarget  |
| CG7334  | Sug          | CG7334-RA  | target     |
|         |              | CG7334-RB  | nontarget  |
| CG7540  | M6           | CG7540-RA  | target     |
|         |              | CG7540-RB  | nontarget  |
| CG7725  | rogdi        | CG7725-RA  | target     |
|         |              | CG7725-RB  | nontarget  |
| CG7908  | Tace         | CG7908-RB  | target     |
|         |              | CG7908-RA  | nontarget  |
| CG8318  | Nf1          | CG8318-RB  | target     |

Continued on next page

Table S7 – continued from previous page

| gene ID | name     | transcript | NMD status      |
|---------|----------|------------|-----------------|
| CG8327  | SpdS     | CG8318-RC  | nontarget       |
|         |          | CG8327-RB  | target          |
| CG8332  | RpS15    | CG8327-RA  | nontarget       |
|         |          | CG8332-RB  | target          |
| CG8376  | ap       | CG8332-RA  | nontarget       |
|         |          | CG8376-RB  | target          |
| CG8430  | Got1     | CG8376-RA  | nontarget       |
|         |          | CG8430-RA  | target          |
| CG8486  |          | CG8430-RB  | nontarget       |
|         |          | CG8486-RB  | target          |
| CG8495  | RpS29    | CG8486-RA  | nontarget       |
|         |          | CG8495-RA  | target          |
| CG8557  |          | CG8495-RC  | nontarget       |
|         |          | CG8557-RA  | target          |
| CG8765  |          | CG8557-RB  | nontarget       |
|         |          | CG8765-RA  | target          |
| CG8783  |          | CG8765-RB  | nontarget       |
|         |          | CG8783-RA  | target          |
| CG8811  | muskelin | CG8783-RB  | nontarget       |
|         |          | CG8811-RA  | target          |
| CG8944  |          | CG8811-RB  | nontarget       |
|         |          | CG8944-RB  | target          |
| CG8956  | Ahcy89E  | CG8944-RA  | nontarget       |
|         |          | CG8956-RC  | target          |
| CG9195  | Scamp    | CG8956-RD  | nontarget       |
|         |          | CG9195-RA  | target          |
| CG9248  |          | CG9195-RB  | nontarget       |
|         |          | CG9248-RB  | target          |
| CG9256  | Nhe2     | CG9248-RA  | nontarget       |
|         |          | CG9256-RA  | target          |
| CG9354  | RpL34b   | CG9256-RB  | nontarget       |
|         |          | CG9354-RA  | target          |
| CG9413  |          | CG9354-RB  | nontarget       |
|         |          | CG9413-RA  | target          |
| CG9415  | Xbp1     | CG9413-RB  | nontarget       |
|         |          | CG9415-RA  | target          |
| CG9425  |          | CG9415-RB  | nontarget       |
|         |          | CG9425-RB  | target          |
| CG9611  |          | CG9425-RA  | nontarget       |
|         |          | CG9611-RB  | target          |
| CR32885 | pgc      | CG9611-RA  | nontarget       |
|         |          | CR32885-RB | target          |
| CG10023 | Fak56D   | CR32885-RA | nontarget       |
|         |          | CG10023-RA | target          |
| CG10107 |          | CG10023-RB | nontarget       |
|         |          | CG10023-RC | possibly absent |
| CG10121 | SP1173   | CG10107-RA | target          |
|         |          | CG10107-RC | target          |
| CG10772 | Fur1     | CG10107-RB | nontarget       |
|         |          | CG10121-RB | target          |
| CG10868 | orb      | CG10121-RA | nontarget       |
|         |          | CG10121-RC | possibly absent |
|         |          | CG10121-RD | possibly absent |
|         |          | CG10772-RC | target          |
|         |          | CG10772-RD | nontarget       |
|         |          | CG10772-RA | possibly absent |
|         |          | CG10772-RB | possibly absent |
|         |          | CG10772-RE | possibly absent |
|         |          | CG10772-RF | possibly absent |
|         |          | CG10868-RC | target          |
|         |          | CG10868-RA | nontarget       |

Continued on next page

Table S7 – continued from previous page

| gene ID | name  | transcript | NMD status      |
|---------|-------|------------|-----------------|
| CG10948 |       | CG10868-RB | nontarget       |
|         |       | CG10948-RB | target          |
|         |       | CG10948-RC | nontarget       |
| CG11081 | plexA | CG10948-RA | possibly absent |
|         |       | CG11081-RA | target          |
|         |       | CG11081-RD | nontarget       |
|         |       | CG11081-RB | possibly absent |
| CG11100 | Mes2  | CG11081-RC | possibly absent |
|         |       | CG11100-RC | target          |
|         |       | CG11100-RA | nontarget       |
| CG11163 |       | CG11100-RB | nontarget       |
|         |       | CG11163-RA | target          |
|         |       | CG11163-RB | target          |
| CG11537 |       | CG11163-RD | target          |
|         |       | CG11163-RC | nontarget       |
|         |       | CG11537-RC | target          |
|         |       | CG11537-RA | nontarget       |
| CG12085 | pUf68 | CG11537-RB | possibly absent |
|         |       | CG12085-RD | target          |
|         |       | CG12085-RB | nontarget       |
|         |       | CG12085-RA | possibly absent |
| CG1213  |       | CG12085-RC | possibly absent |
|         |       | CG1213-RA  | target          |
|         |       | CG1213-RB  | nontarget       |
| CG12746 |       | CG1213-RC  | nontarget       |
|         |       | CG12746-RB | target          |
|         |       | CG12746-RD | nontarget       |
|         |       | CG12746-RA | possibly absent |
| CG14217 | Tao-1 | CG12746-RC | possibly absent |
|         |       | CG14217-RB | target          |
|         |       | CG14217-RA | nontarget       |
|         |       | CG14217-RD | possibly absent |
| CG14414 |       | CG14217-RE | possibly absent |
|         |       | CG14414-RA | target          |
|         |       | CG14414-RB | nontarget       |
| CG14823 |       | CG14414-RC | possibly absent |
|         |       | CG14823-RC | target          |
|         |       | CG14823-RA | nontarget       |
|         |       | CG14823-RB | nontarget       |
| CG14938 | crol  | CG14823-RD | nontarget       |
|         |       | CG14938-RB | target          |
|         |       | CG14938-RA | nontarget       |
|         |       | CG14938-RD | nontarget       |
| CG1623  |       | CG14938-RC | possibly absent |
|         |       | CG1623-RA  | target          |
|         |       | CG1623-RC  | target          |
| CG1634  | Nrg   | CG1623-RE  | nontarget       |
|         |       | CG1634-RC  | target          |
|         |       | CG1634-RB  | nontarget       |
|         |       | CG1634-RA  | possibly absent |
| CG16833 |       | CG16833-RA | target          |
|         |       | CG16833-RB | nontarget       |
|         |       | CG16833-RC | possibly absent |
| CG16901 | sqd   | CG16833-RC | possibly absent |
|         |       | CG16901-RD | target          |
|         |       | CG16901-RB | nontarget       |
|         |       | CG16901-RA | possibly absent |
| CG16952 |       | CG16901-RC | possibly absent |
|         |       | CG16952-RB | target          |
|         |       | CG16952-RA | nontarget       |
| CG16973 | msn   | CG16952-RC | possibly absent |
|         |       | CG16973-RA | target          |

Continued on next page

Table S7 – continued from previous page

| gene ID | name    | transcript | NMD status      |
|---------|---------|------------|-----------------|
|         |         | CG16973-RD | target          |
|         |         | CG16973-RB | nontarget       |
|         |         | CG16973-RC | possibly absent |
|         |         | CG16973-RE | possibly absent |
| CG17332 | VhaSFD  | CG17332-RA | target          |
|         |         | CG17332-RB | nontarget       |
|         |         | CG17332-RD | possibly absent |
| CG17834 |         | CG17834-RB | target          |
|         |         | CG17834-RA | nontarget       |
|         |         | CG17834-RC | possibly absent |
|         |         | CG17834-RD | possibly absent |
| CG18069 | CaMKII  | CG18069-RB | target          |
|         |         | CG18069-RC | nontarget       |
|         |         | CG18069-RA | possibly absent |
| CG18769 |         | CG18769-RF | target          |
|         |         | CG18769-RB | nontarget       |
|         |         | CG18769-RA | possibly absent |
|         |         | CG18769-RC | possibly absent |
|         |         | CG18769-RD | possibly absent |
|         |         | CG18769-RE | possibly absent |
| CG1877  | lin19   | CG1877-RA  | target          |
|         |         | CG1877-RD  | nontarget       |
|         |         | CG1877-RB  | possibly absent |
|         |         | CG1877-RC  | possibly absent |
| CG2216  | Fer1HCH | CG2216-RA  | target          |
|         |         | CG2216-RB  | target          |
|         |         | CG2216-RC  | target          |
|         |         | CG2216-RD  | nontarget       |
|         |         | CG2216-RE  | possibly absent |
| CG2225  |         | CG2225-RC  | target          |
|         |         | CG2225-RD  | nontarget       |
|         |         | CG2225-RA  | possibly absent |
|         |         | CG2225-RB  | possibly absent |
|         |         | CG2225-RE  | possibly absent |
| CG2304  | Trc8    | CG2304-RA  | target          |
|         |         | CG2304-RD  | target          |
|         |         | CG2304-RB  | nontarget       |
|         |         | CG2304-RC  | possibly absent |
| CG31045 | Mhcl    | CG31045-RA | target          |
|         |         | CG31045-RD | nontarget       |
|         |         | CG31045-RB | possibly absent |
|         |         | CG31045-RC | possibly absent |
|         |         | CG31045-RE | possibly absent |
| CG31237 | Rpb4    | CG31318-RA | target          |
|         |         | CG31318-RB | target          |
|         |         | CG31237-RA | nontarget       |
| CG31305 |         | CG31305-RA | target          |
|         |         | CG31305-RG | nontarget       |
|         |         | CG31305-RI | nontarget       |
|         |         | CG31305-RB | possibly absent |
|         |         | CG31305-RD | possibly absent |
|         |         | CG31305-RF | possibly absent |
| CG31332 | unc-115 | CG31332-RA | target          |
|         |         | CG31332-RB | target          |
|         |         | CG31332-RD | target          |
|         |         | CG31332-RC | nontarget       |
| CG31536 | Cdep    | CG31536-RA | target          |
|         |         | CG31536-RC | target          |
|         |         | CG31536-RB | nontarget       |
| CG31764 | vir-1   | CG31764-RA | target          |
|         |         | CG31764-RB | nontarget       |

Continued on next page

Table S7 – continued from previous page

| gene ID | name      | transcript | NMD status      |
|---------|-----------|------------|-----------------|
| CG32018 | Zyx102EF  | CG31764-RC | nontarget       |
|         |           | CG32018-RB | target          |
|         |           | CG32018-RC | target          |
|         |           | CG32018-RE | nontarget       |
|         |           | CG32018-RA | possibly absent |
|         |           | CG32018-RD | possibly absent |
|         |           | CG32018-RF | possibly absent |
| CG32423 | shep      | CG32018-RG | possibly absent |
|         |           | CG32423-RD | target          |
|         |           | CG32423-RB | nontarget       |
|         |           | CG32423-RA | possibly absent |
| CG32508 | shaking B | CG32423-RC | possibly absent |
|         |           | CG32508-RA | target          |
|         |           | CG32508-RB | nontarget       |
| CG32538 | gfA       | CG32508-RC | nontarget       |
|         |           | CG32538-RA | target          |
|         |           | CG32538-RB | nontarget       |
| CG32858 | sn        | CG32538-RC | nontarget       |
|         |           | CG32858-RB | target          |
|         |           | CG32858-RA | nontarget       |
| CG33054 |           | CG32858-RC | possibly absent |
|         |           | CG33056-RB | target          |
|         |           | CG33056-RD | target          |
|         |           | CG33054-RA | nontarget       |
|         |           | CG33056-RC | nontarget       |
| CG33129 |           | CG33054-RB | possibly absent |
|         |           | CG33056-RA | possibly absent |
|         |           | CG33056-RE | possibly absent |
|         |           | CG33129-RE | target          |
|         |           | CG33129-RA | nontarget       |
| CG33184 |           | CG33129-RB | nontarget       |
|         |           | CG33129-RC | possibly absent |
|         |           | CG33184-RC | target          |
| CG33261 | Trl       | CG33184-RA | nontarget       |
|         |           | CG33184-RB | possibly absent |
|         |           | CG33261-RF | target          |
|         |           | CG33261-RA | nontarget       |
|         |           | CG33261-RC | nontarget       |
| CG3638  |           | CG33261-RD | nontarget       |
|         |           | CG33261-RE | nontarget       |
|         |           | CG33261-RB | possibly absent |
|         |           | CG3638-RC  | target          |
| CG3948  | zetaCOP   | CG3638-RA  | nontarget       |
|         |           | CG3638-RB  | nontarget       |
|         |           | CG3638-RD  | nontarget       |
|         |           | CG3948-RC  | target          |
| CG4016  | Spt-I     | CG3948-RA  | nontarget       |
|         |           | CG3948-RB  | nontarget       |
|         |           | CG4016-RB  | target          |
| CG4239  |           | CG4016-RA  | nontarget       |
|         |           | CG4016-RC  | possibly absent |
| CG4376  | Actn      | CG4239-RA  | target          |
|         |           | CG4239-RB  | target          |
|         |           | CG4239-RC  | nontarget       |
| CG4389  |           | CG4376-RB  | target          |
|         |           | CG4376-RA  | nontarget       |
|         |           | CG4376-RC  | possibly absent |
| CG4452  |           | CG4389-RA  | target          |
|         |           | CG4389-RB  | nontarget       |
|         |           | CG4389-RC  | possibly absent |
|         |           | CG4452-RB  | target          |

Continued on next page

Table S7 – continued from previous page

| gene ID | name   | transcript | NMD status      |
|---------|--------|------------|-----------------|
| CG4816  | qkr54B | CG4452-RA  | nontarget       |
|         |        | CG4452-RC  | possibly absent |
|         |        | CG4816-RA  | target          |
|         |        | CG4816-RB  | nontarget       |
| CG4921  | Rab4   | CG4816-RC  | possibly absent |
|         |        | CG4921-RC  | target          |
|         |        | CG4921-RA  | nontarget       |
|         |        | CG4921-RB  | possibly absent |
| CG5288  |        | CG5288-RB  | target          |
|         |        | CG5288-RC  | target          |
|         |        | CG5288-RA  | nontarget       |
| CG5461  | bun    | CG5461-RA  | target          |
|         |        | CG5461-RB  | nontarget       |
|         |        | CG5461-RC  | possibly absent |
| CG5486  | Ubp64E | CG5486-RB  | target          |
|         |        | CG5486-RA  | nontarget       |
|         |        | CG5486-RC  | possibly absent |
|         |        | CG6854-RA  | target          |
| CG6854  |        | CG6854-RB  | nontarget       |
|         |        | CG6854-RC  | possibly absent |
|         |        | CG6946-RC  | target          |
| CG6946  | glo    | CG6946-RA  | nontarget       |
|         |        | CG6946-RB  | possibly absent |
|         |        | CG7176-RF  | target          |
| CG7176  | Idh    | CG7176-RD  | nontarget       |
|         |        | CG7176-RA  | possibly absent |
|         |        | CG7176-RB  | possibly absent |
|         |        | CG7176-RC  | possibly absent |
|         |        | CG7176-RE  | possibly absent |
|         |        | CG7176-RG  | possibly absent |
|         |        | CG7283     | RpL10Ab         |
| CG7555  | Nedd4  | CG7283-RA  | nontarget       |
|         |        | CG7283-RC  | possibly absent |
|         |        | CG7555-RD  | target          |
| CG7926  | Axn    | CG7555-RB  | nontarget       |
|         |        | CG7555-RA  | possibly absent |
|         |        | CG7555-RC  | possibly absent |
|         |        | CG7926-RA  | target          |
| CG8121  |        | CG7926-RB  | nontarget       |
|         |        | CG7926-RC  | possibly absent |
|         |        | CG8121-RA  | target          |
| CG8127  | Eip75B | CG8121-RC  | target          |
|         |        | CG8121-RB  | nontarget       |
|         |        | CG8127-RB  | target          |
|         |        | CG8127-RA  | nontarget       |
| CG8178  | Nach   | CG8127-RC  | possibly absent |
|         |        | CG8127-RD  | possibly absent |
|         |        | CG8178-RB  | target          |
| CG8363  | Paps   | CG8178-RC  | nontarget       |
|         |        | CG8178-RA  | possibly absent |
|         |        | CG8363-RE  | target          |
|         |        | CG8363-RD  | nontarget       |
| CG8440  | Lis-1  | CG8363-RA  | possibly absent |
|         |        | CG8363-RB  | possibly absent |
|         |        | CG8363-RC  | possibly absent |
|         |        | CG8440-RC  | target          |
|         |        | CG8440-RD  | target          |
|         |        | CG8440-RE  | nontarget       |
|         |        | CG8440-RA  | possibly absent |
|         |        | CG8440-RB  | possibly absent |
|         |        | CG8440-RF  | possibly absent |

Continued on next page



Table S7 – continued from previous page

| gene ID | name       | transcript | NMD status      |
|---------|------------|------------|-----------------|
| CG8465  | l(1)G0222  | CG8465-RA  | target          |
|         |            | CG8465-RC  | nontarget       |
|         |            | CG8465-RB  | possibly absent |
| CG8663  | nrν3       | CG8663-RB  | target          |
|         |            | CG8663-RD  | nontarget       |
|         |            | CG8663-RA  | possibly absent |
|         |            | CG8663-RC  | possibly absent |
| CG8732  | l(2)44DEa  | CG8732-RA  | target          |
|         |            | CG8732-RB  | nontarget       |
|         |            | CG8732-RC  | possibly absent |
| CG9277  | betaTub56D | CG9277-RB  | target          |
|         |            | CG9277-RA  | nontarget       |
|         |            | CG9277-RC  | possibly absent |
|         |            | CG9277-RD  | possibly absent |
| CG9381  | mura       | CG9381-RA  | target          |
|         |            | CG9381-RB  | nontarget       |
|         |            | CG9381-RC  | possibly absent |
| CG9755  | pum        | CG9755-RC  | target          |
|         |            | CG9755-RE  | target          |
|         |            | CG9755-RA  | nontarget       |
|         |            | CG9755-RB  | possibly absent |
|         |            | CG9755-RD  | possibly absent |
| CG9772  |            | CG9772-RA  | target          |
|         |            | CG9772-RC  | nontarget       |
|         |            | CG9772-RB  | possibly absent |
