# Supplementary material for: Genome-Wide Identification of Alternative Splice Forms Down-Regulated by Nonsense-Mediated mRNA Decay in Drosophila
Source: PubMed Central journal article supplement (PMC2689934; doi:10.1371/journal.pgen.1000525), 2009-06-19
Supplement: pgen.1000525.s031.pdf [file pgen.1000525.s031.pdf]

**Table S9. Deconvolution results for the stringent set of *upf1* affected genes**

| Gene    | Transcript | alpha | beta | Call            |
|---------|------------|-------|------|-----------------|
| CG1088  | CG1088-RA  | 0.99  | 0.65 | Unchanged       |
|         | CG1088-RB  | 1.85  | 0.35 | Up              |
| CG1263  | CG1263-RA  | 1.09  | 1.00 | Unchanged       |
|         | CG1263-RB  | 2.21  | 0.00 | Up              |
| CG12891 | CG12891-RA | 1.07  | 0.94 | Unchanged       |
|         | CG12891-RB | 1.86  | 0.06 | Up              |
| CG13521 | CG13521-RA | 1.10  | 1.00 | Up              |
|         | CG13521-RB | 0.67  | 0.00 | Slightly down   |
| CG13900 | CG13900-RA | 3.13  | 0.46 | Up              |
|         | CG13900-RB | 1.03  | 0.54 | Unchanged       |
| CG1753  | CG1753-RA  | 1.21  | 1.00 | Unchanged       |
|         | CG1753-RB  | 2.49  | 0.00 | Up              |
| CG18009 | CG18009-RA | 2.34  | 0.00 | Up              |
|         | CG18009-RD | 0.97  | 1.00 | Unchanged       |
| CG1902  | CG1902-RA  | 0.71  | 0.67 | Slightly down   |
|         | CG1902-RC  | 1.49  | 0.33 | Up              |
| CG2152  | CG2152-RA  | 0.75  | 0.97 | Slightly down   |
|         | CG2152-RB  | 1.38  | 0.03 | Up              |
| CG33206 | CG33206-RA | 0.89  | 0.78 | Unchanged       |
|         | CG33206-RB | 7.59  | 0.22 | Up              |
| CG3358  | CG3358-RA  | 3.48  | 0.15 | Up              |
|         | CG3358-RB  | 0.87  | 0.85 | Unchanged       |
| CG3629  | CG3629-RA  | 0.92  | 1.00 | Unchanged       |
|         | CG3629-RB  | 12.96 | 0.00 | Up              |
| CG3731  | CG3731-RA  | 1.50  | 0.13 | Up              |
|         | CG3731-RB  | 0.87  | 0.87 | Unchanged       |
| CG4059  | CG4059-RA  | 5.15  | 0.04 | Up              |
|         | CG4059-RB  | 0.74  | 0.96 | Slightly down   |
| CG4673  | CG4673-RA  | 0.90  | 0.56 | Unchanged       |
|         | CG4673-RB  | 1.81  | 0.44 | Up              |
| CG5215  | CG5215-RA  | 4.17  | 0.32 | Up              |
|         | CG5215-RB  | 0.98  | 0.68 | Unchanged       |
| CG5896  | CG5896-RA  | 3.47  | 0.03 | Up              |
|         | CG5896-RB  | 0.80  | 0.97 | Slightly down   |
| CG6084  | CG6084-RA  | 0.54  | 0.56 | Slightly down   |
|         | CG6084-RB  | 1.29  | 0.44 | Up              |
| CG6315  | CG6315-RA  | 1.01  | 0.75 | Unchanged       |
|         | CG6315-RB  | 2.71  | 0.25 | Up              |
| CG6454  | CG6454-RA  | 7.77  | 0.01 | Up              |
|         | CG6454-RB  | 1.05  | 0.99 | Unchanged       |
| CG7540  | CG7540-RA  | 1.27  | 0.70 | Up              |
|         | CG7540-RB  | 0.66  | 0.30 | Slightly down   |
| CG8332  | CG8332-RA  | 0.59  | 1.00 | Slightly down   |
|         | CG8332-RB  | 4.37  | 0.00 | Up              |
| CG9248  | CG9248-RA  | 0.61  | 0.00 | Slightly down   |
|         | CG9248-RB  | 1.22  | 1.00 | Up              |
| CG9354  | CG9354-RA  | 3.84  | 0.00 | Up              |
|         | CG9354-RB  | 0.66  | 1.00 | Slightly down   |
| CG9413  | CG9413-RA  | 1.15  | 0.95 | Up              |
|         | CG9413-RB  | 0.59  | 0.05 | Slightly down   |
| CG10107 | CG10107-RA | 2.75  | 0.27 | Up              |
|         | CG10107-RB | 0.80  | 0.73 | Unchanged       |
| CG10948 | CG10107-RC | 1.87  | 0.00 | Possibly absent |
|         | CG10948-RA | 0.97  | 0.00 | Possibly absent |
|         | CG10948-RB | 2.94  | 0.15 | Up              |
| CG14217 | CG10948-RC | 1.18  | 0.85 | Unchanged       |
|         | CG14217-RA | 0.83  | 0.00 | Unchanged       |
|         | CG14217-RB | 2.74  | 0.00 | Up              |
| CG14792 | CG14217-RD | 0.82  | 0.00 | Possibly absent |
|         | CG14217-RE | 1.05  | 1.00 | Possibly absent |
|         | CG14792-RA | 1.04  | 0.00 | Unchanged       |

Continued on next page

Table S9 – continued from previous page

| Gene    | Transcript | alpha  | beta | Call            |
|---------|------------|--------|------|-----------------|
|         | CG14792-RB | 4.19   | 0.00 | Up              |
|         | CG14792-RD | 1.55   | 1.00 | Possibly absent |
| CG1623  | CG1623-RA  | 1.56   | 0.00 | Possibly absent |
|         | CG1623-RC  | 2.38   | 0.00 | Up              |
|         | CG1623-RE  | 0.96   | 1.00 | Unchanged       |
| CG16901 | CG16901-RA | 1.03   | 0.70 | Possibly absent |
|         | CG16901-RB | 0.96   | 0.18 | Unchanged       |
|         | CG16901-RC | 0.79   | 0.12 | Possibly absent |
|         | CG16901-RD | 2.45   | 0.00 | Up              |
| CG17299 | CG17299-RA | 1.47   | 0.01 | Possibly absent |
|         | CG17299-RB | 1.12   | 0.00 | Possibly absent |
|         | CG17299-RC | 1.27   | 0.20 | Possibly absent |
|         | CG17299-RD | 1.13   | 0.00 | Possibly absent |
|         | CG17299-RE | 0.96   | 0.00 | Possibly absent |
|         | CG17299-RF | 0.83   | 0.07 | Unchanged       |
|         | CG17299-RG | 1.67   | 0.35 | Up              |
|         | CG17299-RH | 0.83   | 0.36 | Possibly absent |
| CG17332 | CG17332-RA | 1.39   | 0.68 | Up              |
|         | CG17332-RB | 0.78   | 0.00 | Slightly down   |
|         | CG17332-RD | 1.09   | 0.32 | Possibly absent |
| CG18069 | CG18069-RA | 0.96   | 0.00 | Possibly absent |
|         | CG18069-RB | 1.29   | 1.00 | Up              |
|         | CG18069-RC | 0.93   | 0.00 | Unchanged       |
| CG31237 | CG31237-RA | 0.86   | 1.00 | Unchanged       |
|         | CG31318-RA | 1.85   | 0.00 | Up              |
|         | CG31318-RB | 1.34   | 0.00 | Possibly absent |
| CG31305 | CG31305-RA | 1.46   | 0.00 | Up              |
|         | CG31305-RB | 0.84   | 0.00 | Possibly absent |
|         | CG31305-RD | 0.75   | 0.00 | Possibly absent |
|         | CG31305-RF | 0.90   | 0.00 | Possibly absent |
|         | CG31305-RG | 0.63   | 0.77 | Slightly down   |
|         | CG31305-RI | 0.54   | 0.23 | Slightly down   |
| CG31332 | CG31332-RA | 3.59   | 0.00 | Possibly absent |
|         | CG31332-RB | 1.53   | 1.00 | Unchanged       |
|         | CG31332-RC | 0.96   | 0.00 | Unchanged       |
|         | CG31332-RD | 5.88   | 0.00 | Up              |
| CG31764 | CG31764-RA | 1.44   | 0.01 | Up              |
|         | CG31764-RB | 0.65   | 0.02 | Slightly down   |
|         | CG31764-RC | 0.68   | 0.97 | Slightly down   |
| CG32423 | CG32423-RA | 0.90   | 0.38 | Possibly absent |
|         | CG32423-RB | 1.01   | 0.00 | Unchanged       |
|         | CG32423-RC | 1.07   | 0.62 | Possibly absent |
|         | CG32423-RD | 1.92   | 0.00 | Up              |
| CG33175 | CG33175-RA | 0.73   | 0.00 | Slightly down   |
|         | CG33175-RG | 1.39   | 0.00 | Up              |
|         | CG33175-RH | 1.14   | 1.00 | Possibly absent |
| CG4376  | CG4376-RA  | 1.24   | 1.00 | Unchanged       |
|         | CG4376-RB  | 2.21   | 0.00 | Up              |
|         | CG4376-RC  | 1.07   | 0.00 | Possibly absent |
| CG4452  | CG4452-RA  | 1.00   | 0.81 | Unchanged       |
|         | CG4452-RB  | 704.16 | 0.00 | Up              |
|         | CG4452-RC  | 0.88   | 0.19 | Possibly absent |
| CG6854  | CG6854-RA  | 1.36   | 0.00 | Up              |
|         | CG6854-RB  | 0.73   | 0.14 | Slightly down   |
|         | CG6854-RC  | 0.85   | 0.86 | Possibly absent |
| CG6946  | CG6946-RA  | 0.80   | 0.86 | Slightly down   |
|         | CG6946-RB  | 0.94   | 0.00 | Possibly absent |
|         | CG6946-RC  | 4.53   | 0.14 | Up              |
| CG7283  | CG7283-RA  | 0.83   | 0.91 | Unchanged       |
|         | CG7283-RB  | 4.90   | 0.09 | Up              |
|         | CG7283-RC  | 0.75   | 0.00 | Possibly absent |
