# Supplementary material for: Genome-Wide Identification of Alternative Splice Forms Down-Regulated by Nonsense-Mediated mRNA Decay in Drosophila
Source: PubMed Central journal article supplement (PMC2689934; doi:10.1371/journal.pgen.1000525), 2009-06-19
Supplement: pgen.1000525.s032.pdf [file pgen.1000525.s032.pdf]

**Table S10. Deconvolution results for the less stringent set of *upf1* affected genes**

| Gene    | Transcript | alpha | beta | Call          |
|---------|------------|-------|------|---------------|
| CG10079 | CG10079-RA | 0.92  | 1.00 | Unchanged     |
|         | CG10079-RB | 1.51  | 0.00 | Up            |
| CG10126 | CG10126-RA | 1.35  | 0.42 | Up            |
|         | CG10126-RB | 0.80  | 0.58 | Slightly down |
| CG10371 | CG10371-RA | 1.12  | 0.24 | Up            |
|         | CG10371-RB | 0.80  | 0.76 | Slightly down |
| CG10494 | CG10494-RA | 0.91  | 1.00 | Slightly down |
|         | CG10494-RB | 1.43  | 0.00 | Up            |
| CG10699 | CG10699-RA | 0.82  | 1.00 | Slightly down |
|         | CG10699-RB | 1.46  | 0.00 | Up            |
| CG1088  | CG1088-RA  | 0.99  | 0.65 | Unchanged     |
|         | CG1088-RB  | 1.85  | 0.35 | Up            |
| CG10901 | CG10901-RA | 1.22  | 0.45 | Up            |
|         | CG10901-RB | 0.74  | 0.55 | Slightly down |
| CG1104  | CG1104-RA  | 1.31  | 0.35 | Up            |
|         | CG1104-RB  | 0.89  | 0.65 | Unchanged     |
| CG11760 | CG11760-RA | 1.68  | 1.00 | Up            |
|         | CG11760-RB | 0.80  | 0.00 | Slightly down |
| CG11779 | CG11779-RA | 1.14  | 1.00 | Up            |
|         | CG11779-RB | 0.68  | 0.00 | Slightly down |
| CG1200  | CG1200-RA  | 1.07  | 1.00 | Unchanged     |
|         | CG1200-RB  | 1.60  | 0.00 | Up            |
| CG12101 | CG12101-RA | 1.49  | 0.00 | Up            |
|         | CG12101-RB | 1.10  | 1.00 | Unchanged     |
| CG12134 | CG12134-RA | 0.78  | 1.00 | Slightly down |
|         | CG12134-RB | 1.43  | 0.00 | Up            |
| CG1233  | CG1233-RA  | 1.33  | 0.30 | Up            |
|         | CG1233-RB  | 0.82  | 0.70 | Slightly down |
| CG12342 | CG12342-RA | 2.93  | 0.00 | Up            |
|         | CG12342-RB | 0.95  | 1.00 | Unchanged     |
| CG1263  | CG1263-RA  | 1.09  | 1.00 | Unchanged     |
|         | CG1263-RB  | 2.21  | 0.00 | Up            |
| CG12891 | CG12891-RA | 1.07  | 0.94 | Unchanged     |
|         | CG12891-RB | 1.86  | 0.06 | Up            |
| CG13204 | CG13204-RA | 0.83  | 0.64 | Slightly down |
|         | CG13204-RB | 1.84  | 0.36 | Up            |
| CG1338  | CG1338-RA  | 1.45  | 0.00 | Up            |
|         | CG1338-RB  | 0.99  | 1.00 | Unchanged     |
| CG13521 | CG13521-RA | 1.10  | 1.00 | Up            |
|         | CG13521-RB | 0.67  | 0.00 | Slightly down |
| CG1362  | CG1362-RA  | 1.42  | 0.36 | Up            |
|         | CG1362-RB  | 0.85  | 0.64 | Unchanged     |
| CG13900 | CG13900-RA | 3.13  | 0.46 | Up            |
|         | CG13900-RB | 1.03  | 0.54 | Unchanged     |
| CG13923 | CG12022-RA | 1.18  | 0.41 | Up            |
|         | CG13923-RA | 0.79  | 0.59 | Slightly down |
| CG14444 | CG14444-RA | 1.13  | 0.92 | Unchanged     |
|         | CG14444-RB | 2.19  | 0.08 | Up            |
| CG1462  | CG1462-RA  | 0.97  | 1.00 | Unchanged     |
|         | CG1462-RB  | 1.34  | 0.00 | Up            |
| CG1486  | CG1486-RA  | 0.94  | 0.73 | Unchanged     |
|         | CG1486-RB  | 1.63  | 0.27 | Up            |
| CG1488  | CG1488-RA  | 1.09  | 0.88 | Unchanged     |
|         | CG1488-RB  | 1.73  | 0.12 | Up            |
| CG15117 | CG15117-RA | 1.27  | 1.00 | Up            |
|         | CG15117-RB | 0.71  | 0.00 | Slightly down |
| CG15626 | CG15626-RA | 0.86  | 0.55 | Slightly down |
|         | CG15626-RB | 1.42  | 0.45 | Up            |
| CG15881 | CG15881-RA | 0.82  | 1.00 | Slightly down |
|         | CG15881-RB | 1.52  | 0.00 | Up            |
| CG1648  | CG1648-RA  | 1.73  | 0.00 | Up            |

Continued on next page

Table S10 – continued from previous page

| Gene    | Transcript | alpha | beta | Call          |
|---------|------------|-------|------|---------------|
|         | CG1648-RB  | 0.99  | 1.00 | Unchanged     |
| CG16718 | CG16718-RA | 0.78  | 0.00 | Slightly down |
|         | CG16718-RB | 1.17  | 1.00 | Up            |
| CG17035 | CG17035-RA | 0.87  | 0.86 | Unchanged     |
|         | CG17035-RB | 4.20  | 0.14 | Up            |
| CG18009 | CG18009-RA | 2.34  | 0.00 | Up            |
|         | CG18009-RD | 0.97  | 1.00 | Unchanged     |
| CG1866  | CG1866-RA  | 0.74  | 0.56 | Unchanged     |
|         | CG1866-RB  | 3.10  | 0.44 | Up            |
| CG1902  | CG1902-RA  | 0.71  | 0.67 | Slightly down |
|         | CG1902-RC  | 1.49  | 0.33 | Up            |
| CG2152  | CG2152-RA  | 0.75  | 0.97 | Slightly down |
|         | CG2152-RB  | 1.38  | 0.03 | Up            |
| CG2177  | CG2177-RA  | 0.92  | 0.62 | Unchanged     |
|         | CG2177-RB  | 1.25  | 0.38 | Up            |
| CG2179  | CG2179-RA  | 2.60  | 0.54 | Up            |
|         | CG2179-RB  | 1.01  | 0.46 | Unchanged     |
| CG30015 | CG30015-RA | 1.11  | 1.00 | Up            |
|         | CG30015-RB | 0.79  | 0.00 | Slightly down |
| CG31751 | CG31751-RA | 1.07  | 1.00 | Unchanged     |
|         | CG31751-RB | 1.95  | 0.00 | Up            |
| CG3182  | CG3182-RA  | 0.99  | 0.76 | Unchanged     |
|         | CG3182-RB  | 1.55  | 0.24 | Up            |
| CG31961 | CG31961-RA | 1.15  | 0.27 | Up            |
|         | CG31961-RB | 0.82  | 0.73 | Slightly down |
| CG32140 | CG32140-RA | 0.87  | 1.00 | Unchanged     |
|         | CG32140-RB | 1.62  | 0.00 | Up            |
| CG3217  | CG3217-RA  | 1.00  | 1.00 | Unchanged     |
|         | CG3217-RB  | 1.36  | 0.00 | Up            |
| CG3241  | CG3241-RA  | 1.10  | 1.00 | Unchanged     |
|         | CG3241-RB  | 1.50  | 0.00 | Up            |
| CG32647 | CG32647-RA | 1.59  | 0.00 | Up            |
|         | CG32647-RB | 0.98  | 1.00 | Unchanged     |
| CG33085 | CG33085-RA | 0.89  | 0.00 | Slightly down |
|         | CG33085-RD | 1.28  | 1.00 | Up            |
| CG33206 | CG33206-RA | 0.89  | 0.78 | Unchanged     |
|         | CG33206-RB | 7.59  | 0.22 | Up            |
| CG3358  | CG3358-RA  | 3.48  | 0.15 | Up            |
|         | CG3358-RB  | 0.87  | 0.85 | Unchanged     |
| CG3530  | CG3530-RA  | 0.72  | 0.16 | Slightly down |
|         | CG3530-RB  | 1.42  | 0.84 | Up            |
| CG3629  | CG3629-RA  | 0.92  | 1.00 | Slightly down |
|         | CG3629-RB  | 12.96 | 0.00 | Up            |
| CG3731  | CG3731-RA  | 1.50  | 0.13 | Up            |
|         | CG3731-RB  | 0.87  | 0.87 | Slightly down |
| CG3861  | CG3861-RA  | 1.21  | 0.35 | Up            |
|         | CG3861-RB  | 0.67  | 0.65 | Slightly down |
| CG4059  | CG4059-RA  | 5.15  | 0.04 | Up            |
|         | CG4059-RB  | 0.74  | 0.96 | Slightly down |
| CG4070  | CG4070-RA  | 0.79  | 0.13 | Slightly down |
|         | CG4070-RB  | 1.19  | 0.87 | Up            |
| CG4143  | CG4143-RA  | 1.14  | 1.00 | Unchanged     |
|         | CG4143-RB  | 1.85  | 0.00 | Up            |
| CG4247  | CG4247-RA  | 0.59  | 1.00 | Slightly down |
|         | CG4247-RB  | 1.34  | 0.00 | Up            |
| CG4590  | CG4590-RA  | 0.77  | 0.28 | Slightly down |
|         | CG4590-RB  | 1.22  | 0.72 | Up            |
| CG4609  | CG4609-RA  | 1.98  | 0.36 | Up            |
|         | CG4609-RB  | 1.07  | 0.64 | Unchanged     |
| CG4673  | CG4673-RA  | 0.90  | 0.56 | Unchanged     |
|         | CG4673-RB  | 1.81  | 0.44 | Up            |

Continued on next page

Table S10 – continued from previous page

| Gene   | Transcript | alpha | beta | Call          |
|--------|------------|-------|------|---------------|
| CG4712 | CG4712-RA  | 0.89  | 1.00 | Slightly down |
|        | CG4712-RB  | 1.40  | 0.00 | Up            |
| CG4795 | CG4795-RA  | 0.98  | 1.00 | Unchanged     |
|        | CG4795-RB  | 1.49  | 0.00 | Up            |
| CG5081 | CG5081-RA  | 1.12  | 1.00 | Up            |
|        | CG5081-RB  | 0.80  | 0.00 | Slightly down |
| CG5215 | CG5215-RA  | 4.17  | 0.32 | Up            |
|        | CG5215-RB  | 0.98  | 0.68 | Unchanged     |
| CG5326 | CG5326-RA  | 0.83  | 1.00 | Slightly down |
|        | CG5326-RB  | 1.38  | 0.00 | Up            |
| CG5394 | CG5394-RA  | 1.28  | 0.00 | Up            |
|        | CG5394-RB  | 0.97  | 1.00 | Unchanged     |
| CG5613 | CG5613-RA  | 0.91  | 0.72 | Unchanged     |
|        | CG5613-RB  | 1.60  | 0.28 | Up            |
| CG5625 | CG5625-RA  | 1.23  | 0.87 | Up            |
|        | CG5625-RB  | 0.77  | 0.13 | Slightly down |
| CG5729 | CG5729-RA  | 0.66  | 0.01 | Slightly down |
|        | CG5729-RB  | 10.30 | 0.99 | Up            |
| CG5785 | CG5785-RA  | 0.85  | 1.00 | Slightly down |
|        | CG5785-RB  | 1.41  | 0.00 | Up            |
| CG5854 | CG5854-RA  | 1.32  | 0.08 | Up            |
|        | CG5854-RB  | 1.00  | 0.92 | Unchanged     |
| CG5896 | CG5896-RA  | 3.47  | 0.03 | Up            |
|        | CG5896-RB  | 0.80  | 0.97 | Slightly down |
| CG6023 | CG6023-RA  | 0.78  | 0.96 | Slightly down |
|        | CG6023-RB  | 1.50  | 0.04 | Up            |
| CG6084 | CG6084-RA  | 0.54  | 0.56 | Slightly down |
|        | CG6084-RB  | 1.29  | 0.44 | Up            |
| CG6090 | CG6090-RA  | 0.56  | 1.00 | Slightly down |
|        | CG6090-RB  | 1.32  | 0.00 | Up            |
| CG6297 | CG6297-RA  | 1.41  | 0.00 | Up            |
|        | CG6297-RB  | 1.00  | 1.00 | Unchanged     |
| CG6315 | CG6315-RA  | 1.01  | 0.75 | Unchanged     |
|        | CG6315-RB  | 2.71  | 0.25 | Up            |
| CG6454 | CG6454-RA  | 7.77  | 0.01 | Up            |
|        | CG6454-RB  | 1.05  | 0.99 | Unchanged     |
| CG6608 | CG6608-RA  | 1.05  | 1.00 | Unchanged     |
|        | CG6608-RB  | 1.41  | 0.00 | Up            |
| CG6726 | CG6726-RA  | 1.20  | 1.00 | Up            |
|        | CG6726-RB  | 0.73  | 0.00 | Slightly down |
| CG6767 | CG6767-RA  | 1.24  | 0.00 | Up            |
|        | CG6767-RB  | 0.93  | 1.00 | Slightly down |
| CG6798 | CG6798-RA  | 1.27  | 0.62 | Up            |
|        | CG6798-RB  | 0.84  | 0.38 | Slightly down |
| CG6829 | CG6829-RA  | 0.89  | 0.65 | Unchanged     |
|        | CG6829-RB  | 1.32  | 0.35 | Up            |
| CG6891 | CG6891-RA  | 1.06  | 1.00 | Unchanged     |
|        | CG6891-RB  | 1.26  | 0.00 | Up            |
| CG7070 | CG7070-RA  | 0.77  | 0.00 | Slightly down |
|        | CG7070-RB  | 1.23  | 1.00 | Up            |
| CG7263 | CG7263-RA  | 1.45  | 0.33 | Up            |
|        | CG7263-RB  | 0.78  | 0.67 | Slightly down |
| CG7334 | CG7334-RA  | 1.21  | 0.98 | Up            |
|        | CG7334-RB  | 0.81  | 0.02 | Slightly down |
| CG7540 | CG7540-RA  | 1.27  | 0.70 | Up            |
|        | CG7540-RB  | 0.66  | 0.30 | Slightly down |
| CG7725 | CG7725-RA  | 1.38  | 1.00 | Up            |
|        | CG7725-RB  | 0.86  | 0.00 | Slightly down |
| CG7908 | CG7908-RA  | 0.96  | 1.00 | Unchanged     |
|        | CG7908-RB  | 1.29  | 0.00 | Up            |
| CG8318 | CG8318-RB  | 1.08  | 1.00 | Up            |

Continued on next page

Table S10 – continued from previous page

| Gene    | Transcript | alpha | beta | Call            |
|---------|------------|-------|------|-----------------|
|         | CG8318-RC  | 0.61  | 0.00 | Slightly down   |
| CG8327  | CG8327-RA  | 0.59  | 0.92 | Slightly down   |
|         | CG8327-RB  | 1.28  | 0.08 | Up              |
| CG8332  | CG8332-RA  | 0.59  | 1.00 | Slightly down   |
|         | CG8332-RB  | 4.37  | 0.00 | Up              |
| CG8376  | CG8376-RA  | 0.86  | 0.89 | Slightly down   |
|         | CG8376-RB  | 1.34  | 0.11 | Up              |
| CG8430  | CG8430-RA  | 2.00  | 0.53 | Up              |
|         | CG8430-RB  | 0.83  | 0.47 | Slightly down   |
| CG8486  | CG8486-RA  | 0.73  | 0.00 | Slightly down   |
|         | CG8486-RB  | 1.34  | 1.00 | Up              |
| CG8495  | CG8495-RA  | 1.87  | 0.17 | Up              |
|         | CG8495-RC  | 0.83  | 0.83 | Unchanged       |
| CG8557  | CG8557-RA  | 1.07  | 1.00 | Up              |
|         | CG8557-RB  | 0.75  | 0.00 | Slightly down   |
| CG8765  | CG8765-RA  | 1.58  | 0.01 | Up              |
|         | CG8765-RB  | 1.12  | 0.99 | Unchanged       |
| CG8783  | CG8783-RA  | 1.49  | 0.18 | Up              |
|         | CG8783-RB  | 0.85  | 0.82 | Slightly down   |
| CG8811  | CG8811-RA  | 1.49  | 0.19 | Up              |
|         | CG8811-RB  | 0.86  | 0.81 | Unchanged       |
| CG8944  | CG8944-RA  | 1.02  | 0.97 | Unchanged       |
|         | CG8944-RB  | 2.19  | 0.03 | Up              |
| CG8956  | CG8956-RC  | 1.42  | 0.27 | Up              |
|         | CG8956-RD  | 0.84  | 0.73 | Slightly down   |
| CG9195  | CG9195-RA  | 1.47  | 1.00 | Up              |
|         | CG9195-RB  | 0.78  | 0.00 | Slightly down   |
| CG9248  | CG9248-RA  | 0.61  | 0.00 | Slightly down   |
|         | CG9248-RB  | 1.22  | 1.00 | Up              |
| CG9256  | CG9256-RA  | 1.07  | 1.00 | Up              |
|         | CG9256-RB  | 0.67  | 0.00 | Slightly down   |
| CG9354  | CG9354-RA  | 3.84  | 0.00 | Up              |
|         | CG9354-RB  | 0.66  | 1.00 | Slightly down   |
| CG9413  | CG9413-RA  | 1.15  | 0.95 | Up              |
|         | CG9413-RB  | 0.59  | 0.05 | Slightly down   |
| CG9415  | CG9415-RA  | 1.48  | 0.70 | Up              |
|         | CG9415-RB  | 0.73  | 0.30 | Slightly down   |
| CG9425  | CG9425-RA  | 0.73  | 0.40 | Slightly down   |
|         | CG9425-RB  | 1.37  | 0.60 | Up              |
| CG9611  | CG9611-RA  | 0.81  | 0.39 | Slightly down   |
|         | CG9611-RB  | 1.47  | 0.61 | Up              |
| CR32885 | CR32885-RA | 0.80  | 0.83 | Slightly down   |
|         | CR32885-RB | 1.23  | 0.17 | Up              |
| CG10023 | CG10023-RA | 1.18  | 1.00 | Up              |
|         | CG10023-RB | 0.75  | 0.00 | Slightly down   |
|         | CG10023-RC | 0.92  | 0.00 | Possibly absent |
| CG10107 | CG10107-RA | 2.75  | 0.27 | Up              |
|         | CG10107-RB | 0.80  | 0.73 | Unchanged       |
|         | CG10107-RC | 1.87  | 0.00 | Up              |
| CG10121 | CG10121-RA | 0.74  | 0.28 | Slightly down   |
|         | CG10121-RB | 1.37  | 0.00 | Up              |
|         | CG10121-RC | 0.91  | 0.63 | Possibly absent |
|         | CG10121-RD | 1.23  | 0.09 | Possibly absent |
| CG10772 | CG10772-RA | 1.18  | 0.00 | Possibly absent |
|         | CG10772-RB | 0.85  | 0.02 | Possibly absent |
|         | CG10772-RC | 2.78  | 0.05 | Up              |
|         | CG10772-RD | 1.17  | 0.89 | Unchanged       |
|         | CG10772-RE | 1.18  | 0.04 | Possibly absent |
|         | CG10772-RF | 1.03  | 0.00 | Possibly absent |
| CG10868 | CG10868-RA | 0.89  | 0.31 | Slightly down   |
|         | CG10868-RB | 0.66  | 0.27 | Slightly down   |

Continued on next page

Table S10 – continued from previous page

| Gene    | Transcript | alpha | beta | Call            |
|---------|------------|-------|------|-----------------|
|         | CG10868-RC | 1.33  | 0.43 | Up              |
| CG10948 | CG10948-RA | 0.97  | 0.00 | Possibly absent |
|         | CG10948-RB | 2.94  | 0.15 | Up              |
|         | CG10948-RC | 1.18  | 0.85 | Unchanged       |
| CG11081 | CG11081-RA | 1.16  | 1.00 | Up              |
|         | CG11081-RB | 0.83  | 0.00 | Possibly absent |
|         | CG11081-RC | 0.95  | 0.00 | Possibly absent |
|         | CG11081-RD | 0.70  | 0.00 | Slightly down   |
| CG11100 | CG11100-RA | 0.82  | 0.07 | Slightly down   |
|         | CG11100-RB | 0.87  | 0.68 | Slightly down   |
|         | CG11100-RC | 1.31  | 0.25 | Up              |
| CG11163 | CG11163-RA | 1.23  | 0.00 | Up              |
|         | CG11163-RB | 1.35  | 0.00 | Up              |
|         | CG11163-RC | 1.07  | 0.00 | Unchanged       |
|         | CG11163-RD | 1.34  | 1.00 | Up              |
| CG11537 | CG11537-RA | 0.80  | 0.00 | Slightly down   |
|         | CG11537-RB | 1.01  | 0.00 | Possibly absent |
|         | CG11537-RC | 1.14  | 1.00 | Up              |
| CG12085 | CG12085-RA | 0.96  | 0.00 | Possibly absent |
|         | CG12085-RB | 1.10  | 0.64 | Unchanged       |
|         | CG12085-RC | 1.40  | 0.00 | Possibly absent |
|         | CG12085-RD | 2.05  | 0.36 | Up              |
| CG1213  | CG1213-RA  | 1.24  | 0.26 | Up              |
|         | CG1213-RB  | 0.75  | 0.67 | Slightly down   |
|         | CG1213-RC  | 0.75  | 0.07 | Slightly down   |
| CG12746 | CG12746-RA | 1.04  | 0.00 | Possibly absent |
|         | CG12746-RB | 1.20  | 1.00 | Up              |
|         | CG12746-RC | 0.69  | 0.00 | Possibly absent |
|         | CG12746-RD | 0.72  | 0.00 | Slightly down   |
| CG14217 | CG14217-RA | 0.83  | 0.00 | Unchanged       |
|         | CG14217-RB | 2.74  | 0.00 | Up              |
|         | CG14217-RD | 0.82  | 0.00 | Possibly absent |
|         | CG14217-RE | 1.05  | 1.00 | Possibly absent |
| CG14414 | CG14414-RA | 1.97  | 0.36 | Up              |
|         | CG14414-RB | 1.09  | 0.64 | Unchanged       |
|         | CG14414-RC | 0.92  | 0.00 | Possibly absent |
| CG14823 | CG14823-RA | 0.70  | 0.01 | Slightly down   |
|         | CG14823-RB | 0.00  | 0.08 | Slightly down   |
|         | CG14823-RC | 1.24  | 0.17 | Up              |
|         | CG14823-RD | 0.91  | 0.74 | Unchanged       |
| CG14938 | CG14938-RA | 0.93  | 0.76 | Unchanged       |
|         | CG14938-RB | 1.41  | 0.02 | Up              |
|         | CG14938-RC | 0.81  | 0.00 | Possibly absent |
|         | CG14938-RD | 0.82  | 0.21 | Slightly down   |
| CG1623  | CG1623-RA  | 1.56  | 0.00 | Up              |
|         | CG1623-RC  | 2.38  | 0.00 | Up              |
|         | CG1623-RE  | 0.96  | 1.00 | Unchanged       |
| CG1634  | CG1634-RA  | 0.89  | 0.51 | Possibly absent |
|         | CG1634-RB  | 0.70  | 0.00 | Slightly down   |
|         | CG1634-RC  | 1.32  | 0.49 | Up              |
| CG16833 | CG16833-RA | 1.17  | 0.42 | Up              |
|         | CG16833-RB | 0.79  | 0.00 | Slightly down   |
|         | CG16833-RC | 0.98  | 0.58 | Possibly absent |
| CG16901 | CG16901-RA | 1.03  | 0.70 | Possibly absent |
|         | CG16901-RB | 0.96  | 0.18 | Unchanged       |
|         | CG16901-RC | 0.79  | 0.12 | Possibly absent |
|         | CG16901-RD | 2.45  | 0.00 | Up              |
| CG16952 | CG16952-RA | 0.74  | 0.01 | Slightly down   |
|         | CG16952-RB | 1.15  | 0.99 | Up              |
|         | CG16952-RC | 1.10  | 0.00 | Possibly absent |
| CG16973 | CG16973-RA | 1.64  | 0.16 | Up              |

Continued on next page

Table S10 – continued from previous page

| Gene    | Transcript | alpha   | beta | Call            |
|---------|------------|---------|------|-----------------|
|         | CG16973-RB | 1.01    | 0.83 | Unchanged       |
|         | CG16973-RC | 0.92    | 0.00 | Possibly absent |
|         | CG16973-RD | 1.57    | 0.01 | Up              |
|         | CG16973-RE | 0.98    | 0.00 | Possibly absent |
| CG17332 | CG17332-RA | 1.39    | 0.68 | Up              |
|         | CG17332-RB | 0.78    | 0.00 | Slightly down   |
|         | CG17332-RD | 1.09    | 0.32 | Possibly absent |
| CG17834 | CG17834-RA | 0.76    | 0.00 | Slightly down   |
|         | CG17834-RB | 1.41    | 0.99 | Up              |
|         | CG17834-RC | 1.14    | 0.00 | Possibly absent |
|         | CG17834-RD | 0.79    | 0.01 | Possibly absent |
| CG18069 | CG18069-RA | 0.96    | 0.00 | Possibly absent |
|         | CG18069-RB | 1.29    | 1.00 | Up              |
|         | CG18069-RC | 0.93    | 0.00 | Unchanged       |
| CG18769 | CG18769-RA | 0.87    | 0.00 | Possibly absent |
|         | CG18769-RB | 0.74    | 0.00 | Slightly down   |
|         | CG18769-RC | 0.97    | 0.74 | Possibly absent |
|         | CG18769-RD | 1.04    | 0.13 | Possibly absent |
|         | CG18769-RE | 0.88    | 0.00 | Possibly absent |
|         | CG18769-RF | 1.37    | 0.14 | Up              |
| CG1877  | CG1877-RA  | 1.49    | 0.00 | Up              |
|         | CG1877-RB  | 1.21    | 1.00 | Possibly absent |
|         | CG1877-RC  | 1.07    | 0.00 | Possibly absent |
|         | CG1877-RD  | 0.97    | 0.00 | Unchanged       |
| CG2216  | CG2216-RA  | 1.59    | 0.00 | Up              |
|         | CG2216-RB  | 5.02    | 0.14 | Up              |
|         | CG2216-RC  | 2.17    | 0.05 | Up              |
|         | CG2216-RD  | 1.08    | 0.42 | Unchanged       |
|         | CG2216-RE  | 0.97    | 0.38 | Possibly absent |
| CG2225  | CG2225-RA  | 0.94    | 0.03 | Possibly absent |
|         | CG2225-RB  | 21.02   | 0.00 | Possibly absent |
|         | CG2225-RC  | 1.08    | 0.86 | Up              |
|         | CG2225-RD  | 0.72    | 0.10 | Slightly down   |
|         | CG2225-RE  | 1.10    | 0.01 | Possibly absent |
| CG2304  | CG2304-RA  | 1.39    | 0.78 | Up              |
|         | CG2304-RB  | 0.00    | 0.09 | Slightly down   |
|         | CG2304-RC  | 1.13    | 0.00 | Possibly absent |
|         | CG2304-RD  | 1.39    | 0.13 | Up              |
| CG31045 | CG31045-RA | 1.18    | 0.05 | Up              |
|         | CG31045-RB | 1.08    | 0.01 | Possibly absent |
|         | CG31045-RC | 1.09    | 0.00 | Possibly absent |
|         | CG31045-RD | 0.88    | 0.90 | Slightly down   |
|         | CG31045-RE | 0.78    | 0.04 | Possibly absent |
| CG31237 | CG31237-RA | 0.86    | 1.00 | Slightly down   |
|         | CG31318-RA | 1.85    | 0.00 | Up              |
|         | CG31318-RB | 1.34    | 0.00 | Up              |
| CG31305 | CG31305-RA | 1.46    | 0.00 | Up              |
|         | CG31305-RB | 0.84    | 0.00 | Possibly absent |
|         | CG31305-RD | 0.75    | 0.00 | Possibly absent |
|         | CG31305-RF | 0.90    | 0.00 | Possibly absent |
|         | CG31305-RG | 0.63    | 0.77 | Slightly down   |
|         | CG31305-RI | 0.54    | 0.23 | Slightly down   |
| CG31332 | CG31332-RA | 3.59    | 0.00 | Up              |
|         | CG31332-RB | 1.53    | 1.00 | Up              |
|         | CG31332-RC | 0.96    | 0.00 | Unchanged       |
|         | CG31332-RD | 5.88    | 0.00 | Up              |
| CG31536 | CG31536-RA | 2087.70 | 0.00 | Up              |
|         | CG31536-RB | 0.77    | 0.32 | Slightly down   |
|         | CG31536-RC | 1.25    | 0.68 | Up              |
| CG31764 | CG31764-RA | 1.44    | 0.01 | Up              |
|         | CG31764-RB | 0.65    | 0.02 | Slightly down   |

Continued on next page

Table S10 – continued from previous page

| Gene    | Transcript | alpha | beta | Call            |
|---------|------------|-------|------|-----------------|
| CG32018 | CG31764-RC | 0.68  | 0.97 | Slightly down   |
|         | CG32018-RA | 1.13  | 0.00 | Possibly absent |
|         | CG32018-RB | 1.40  | 0.00 | Up              |
|         | CG32018-RC | 1.53  | 0.00 | Up              |
|         | CG32018-RD | 1.01  | 0.29 | Possibly absent |
|         | CG32018-RE | 1.00  | 0.44 | Unchanged       |
|         | CG32018-RF | 1.05  | 0.26 | Possibly absent |
| CG32423 | CG32018-RG | 1.14  | 0.00 | Possibly absent |
|         | CG32423-RA | 0.90  | 0.38 | Possibly absent |
|         | CG32423-RB | 1.01  | 0.00 | Unchanged       |
|         | CG32423-RC | 1.07  | 0.62 | Possibly absent |
| CG32508 | CG32423-RD | 1.92  | 0.00 | Up              |
|         | CG32508-RA | 1.52  | 0.00 | Up              |
|         | CG32508-RB | 0.80  | 0.30 | Slightly down   |
| CG32538 | CG32508-RC | 1.09  | 0.70 | Unchanged       |
|         | CG32538-RA | 2.05  | 0.00 | Up              |
|         | CG32538-RB | 0.81  | 0.00 | Slightly down   |
| CG32858 | CG32538-RC | 0.88  | 1.00 | Slightly down   |
|         | CG32858-RA | 0.98  | 1.00 | Unchanged       |
|         | CG32858-RB | 1.47  | 0.00 | Up              |
| CG33054 | CG32858-RC | 0.94  | 0.00 | Possibly absent |
|         | CG33054-RA | 0.67  | 0.59 | Slightly down   |
|         | CG33054-RB | 0.91  | 0.00 | Possibly absent |
|         | CG33056-RA | 1.01  | 0.00 | Possibly absent |
|         | CG33056-RB | 1.45  | 0.40 | Up              |
| CG33129 | CG33056-RC | 0.86  | 0.00 | Slightly down   |
|         | CG33056-RD | 3.26  | 0.00 | Up              |
|         | CG33056-RE | 1.06  | 0.01 | Possibly absent |
|         | CG33129-RA | 0.48  | 0.79 | Slightly down   |
|         | CG33129-RB | 0.56  | 0.00 | Slightly down   |
| CG33184 | CG33129-RC | 0.83  | 0.00 | Possibly absent |
|         | CG33129-RE | 1.08  | 0.21 | Up              |
|         | CG33184-RA | 0.66  | 1.00 | Slightly down   |
| CG33261 | CG33184-RB | 1.18  | 0.00 | Possibly absent |
|         | CG33184-RC | 1.43  | 0.00 | Up              |
|         | CG33261-RA | 0.00  | 0.00 | Slightly down   |
|         | CG33261-RB | 0.87  | 0.00 | Possibly absent |
|         | CG33261-RC | 0.28  | 0.52 | Slightly down   |
| CG3638  | CG33261-RD | 0.72  | 0.48 | Unchanged       |
|         | CG33261-RE | 0.61  | 0.00 | Slightly down   |
|         | CG33261-RF | 1.57  | 0.00 | Up              |
|         | CG3638-RA  | 0.95  | 0.00 | Unchanged       |
|         | CG3638-RB  | 0.62  | 0.00 | Slightly down   |
| CG3948  | CG3638-RC  | 1.90  | 0.02 | Up              |
|         | CG3638-RD  | 1.00  | 0.98 | Unchanged       |
|         | CG3948-RA  | 0.45  | 0.83 | Slightly down   |
|         | CG3948-RB  | 0.78  | 0.00 | Slightly down   |
| CG4016  | CG3948-RC  | 1.28  | 0.17 | Up              |
|         | CG4016-RA  | 0.76  | 0.25 | Slightly down   |
|         | CG4016-RB  | 1.15  | 0.56 | Up              |
| CG4239  | CG4016-RC  | 0.86  | 0.19 | Possibly absent |
|         | CG4239-RA  | 1.53  | 0.00 | Up              |
|         | CG4239-RB  | 1.68  | 0.01 | Up              |
| CG4376  | CG4239-RC  | 0.98  | 0.99 | Unchanged       |
|         | CG4376-RA  | 1.24  | 1.00 | Unchanged       |
|         | CG4376-RB  | 2.21  | 0.00 | Up              |
| CG4389  | CG4376-RC  | 1.07  | 0.00 | Possibly absent |
|         | CG4389-RA  | 1.49  | 0.77 | Up              |
|         | CG4389-RB  | 0.79  | 0.23 | Slightly down   |
| CG4452  | CG4389-RC  | 0.81  | 0.00 | Possibly absent |
|         | CG4452-RA  | 1.00  | 0.81 | Unchanged       |

Continued on next page

Table S10 – continued from previous page

| Gene   | Transcript | alpha  | beta | Call            |
|--------|------------|--------|------|-----------------|
|        | CG4452-RB  | 704.16 | 0.00 | Up              |
|        | CG4452-RC  | 0.88   | 0.19 | Possibly absent |
| CG4816 | CG4816-RA  | 897.26 | 0.00 | Up              |
|        | CG4816-RB  | 1.08   | 0.61 | Unchanged       |
|        | CG4816-RC  | 1.01   | 0.39 | Possibly absent |
| CG4921 | CG4921-RA  | 0.00   | 0.28 | Slightly down   |
|        | CG4921-RB  | 1.14   | 0.26 | Possibly absent |
|        | CG4921-RC  | 1.32   | 0.46 | Up              |
| CG5288 | CG5288-RA  | 0.45   | 0.47 | Slightly down   |
|        | CG5288-RB  | 1.23   | 0.04 | Up              |
|        | CG5288-RC  | 1.32   | 0.48 | Up              |
| CG5461 | CG5461-RA  | 1.41   | 0.00 | Up              |
|        | CG5461-RB  | 0.88   | 0.00 | Unchanged       |
|        | CG5461-RC  | 1.01   | 1.00 | Possibly absent |
| CG5486 | CG5486-RA  | 0.68   | 0.54 | Slightly down   |
|        | CG5486-RB  | 1.28   | 0.46 | Up              |
|        | CG5486-RC  | 0.91   | 0.00 | Possibly absent |
| CG6854 | CG6854-RA  | 1.36   | 0.00 | Up              |
|        | CG6854-RB  | 0.73   | 0.14 | Slightly down   |
|        | CG6854-RC  | 0.85   | 0.86 | Possibly absent |
| CG6946 | CG6946-RA  | 0.80   | 0.86 | Slightly down   |
|        | CG6946-RB  | 0.94   | 0.00 | Possibly absent |
|        | CG6946-RC  | 4.53   | 0.14 | Up              |
| CG7176 | CG7176-RA  | 0.87   | 0.00 | Possibly absent |
|        | CG7176-RB  | 0.98   | 0.00 | Possibly absent |
|        | CG7176-RC  | 0.96   | 0.19 | Possibly absent |
|        | CG7176-RD  | 0.82   | 0.00 | Slightly down   |
|        | CG7176-RE  | 0.04   | 0.10 | Possibly absent |
|        | CG7176-RF  | 1.28   | 0.71 | Up              |
|        | CG7176-RG  | 1.12   | 0.00 | Possibly absent |
| CG7283 | CG7283-RA  | 0.83   | 0.91 | Unchanged       |
|        | CG7283-RB  | 4.90   | 0.09 | Up              |
|        | CG7283-RC  | 0.75   | 0.00 | Possibly absent |
| CG7555 | CG7555-RA  | 1.07   | 0.00 | Possibly absent |
|        | CG7555-RB  | 0.85   | 0.00 | Slightly down   |
|        | CG7555-RC  | 0.91   | 0.07 | Possibly absent |
|        | CG7555-RD  | 1.11   | 0.93 | Up              |
| CG7926 | CG7926-RA  | 87.05  | 0.00 | Up              |
|        | CG7926-RB  | 0.97   | 0.84 | Unchanged       |
|        | CG7926-RC  | 0.86   | 0.16 | Possibly absent |
| CG8121 | CG8121-RA  | 1.19   | 0.74 | Up              |
|        | CG8121-RB  | 0.67   | 0.26 | Slightly down   |
|        | CG8121-RC  | 1.30   | 0.00 | Up              |
| CG8127 | CG8127-RA  | 0.85   | 0.00 | Slightly down   |
|        | CG8127-RB  | 1.09   | 0.96 | Up              |
|        | CG8127-RC  | 0.87   | 0.00 | Possibly absent |
|        | CG8127-RD  | 0.89   | 0.04 | Possibly absent |
| CG8178 | CG8178-RA  | 0.93   | 0.00 | Possibly absent |
|        | CG8178-RB  | 1.89   | 0.00 | Up              |
|        | CG8178-RC  | 0.92   | 1.00 | Slightly down   |
| CG8363 | CG8363-RA  | 1.20   | 0.00 | Possibly absent |
|        | CG8363-RB  | 1.04   | 0.00 | Possibly absent |
|        | CG8363-RC  | 1.00   | 0.01 | Possibly absent |
|        | CG8363-RD  | 0.84   | 0.94 | Slightly down   |
|        | CG8363-RE  | 1.28   | 0.04 | Up              |
| CG8440 | CG8440-RA  | 1.15   | 0.34 | Possibly absent |
|        | CG8440-RB  | 1.01   | 0.00 | Possibly absent |
|        | CG8440-RC  | 1.45   | 0.24 | Up              |
|        | CG8440-RD  | 1.15   | 0.41 | Up              |
|        | CG8440-RE  | 0.73   | 0.02 | Slightly down   |
|        | CG8440-RF  | 1.13   | 0.00 | Possibly absent |

Continued on next page



Table S10 – continued from previous page

| Gene      | Transcript | alpha     | beta | Call            |               |
|-----------|------------|-----------|------|-----------------|---------------|
| CG8465    | CG8465-RA  | 1.18      | 0.42 | Up              |               |
|           | CG8465-RB  | 0.94      | 0.16 | Possibly absent |               |
|           | CG8465-RC  | 0.77      | 0.43 | Slightly down   |               |
| CG8663    | CG8663-RA  | 1.10      | 0.00 | Possibly absent |               |
|           | CG8663-RB  | 1.07      | 0.92 | Up              |               |
|           | CG8663-RC  | 1.09      | 0.00 | Possibly absent |               |
| CG8732    | CG8663-RD  | 0.81      | 0.08 | Slightly down   |               |
|           | CG8732-RA  | 1.07      | 1.00 | Up              |               |
|           | CG8732-RB  | 0.68      | 0.00 | Slightly down   |               |
| CG8732-RC | CG8732-RC  | 0.89      | 0.00 | Possibly absent |               |
|           | CG9277     | CG9277-RA | 0.80 | 0.63            | Slightly down |
|           |            | CG9277-RB | 1.13 | 0.37            | Up            |
| CG9277-RC |            | 0.80      | 0.00 | Possibly absent |               |
| CG9277-RD | CG9277-RD  | 0.96      | 0.00 | Possibly absent |               |
|           | CG9381     | CG9381-RA | 1.31 | 0.98            | Up            |
|           |            | CG9381-RB | 0.65 | 0.02            | Slightly down |
| CG9381-RC |            | 1.11      | 0.00 | Possibly absent |               |
| CG9755    | CG9755-RA  | 0.78      | 0.00 | Slightly down   |               |
|           | CG9755-RB  | 1.00      | 0.00 | Possibly absent |               |
|           | CG9755-RC  | 1.35      | 0.00 | Up              |               |
| CG9755-RD | CG9755-RD  | 1.27      | 0.00 | Possibly absent |               |
|           | CG9755-RE  | 1.15      | 1.00 | Up              |               |
|           | CG9772     | CG9772-RA | 1.11 | 0.76            | Up            |
| CG9772-RB |            | 0.93      | 0.00 | Possibly absent |               |
| CG9772-RC |            | 0.86      | 0.24 | Slightly down   |               |
