# Supplementary material for: Genome-Wide Identification of Alternative Splice Forms Down-Regulated by Nonsense-Mediated mRNA Decay in Drosophila
Source: PubMed Central journal article supplement (PMC2689934; doi:10.1371/journal.pgen.1000525), 2009-06-19
Supplement: pgen.1000525.s033.pdf [file pgen.1000525.s033.pdf]

**Table S11. Deconvolution results for the stringent set of *upf2* affected genes**

| Gene    | Transcript | alpha | beta | Call            |
|---------|------------|-------|------|-----------------|
| CG33206 | CG33206-RA | 0.66  | 0.83 | Slightly down   |
|         | CG33206-RB | 4.94  | 0.17 | Up              |
| CG3321  | CG3321-RA  | 1.38  | 0.93 | Up              |
|         | CG3321-RB  | 0.59  | 0.07 | Slightly down   |
| CG3358  | CG3358-RA  | 1.75  | 0.37 | Up              |
|         | CG3358-RB  | 0.60  | 0.63 | Slightly down   |
| CG3629  | CG3629-RA  | 1.12  | 0.98 | Unchanged       |
|         | CG3629-RB  | 3.69  | 0.02 | Up              |
| CG5215  | CG5215-RA  | 3.77  | 0.27 | Up              |
|         | CG5215-RB  | 0.94  | 0.73 | Unchanged       |
| CG5896  | CG5896-RA  | 3.04  | 0.01 | Up              |
|         | CG5896-RB  | 0.74  | 0.99 | Slightly down   |
| CG6359  | CG6359-RA  | 1.15  | 1.00 | Up              |
|         | CG6359-RB  | 0.65  | 0.00 | Slightly down   |
| CG6454  | CG6454-RA  | 3.35  | 0.01 | Up              |
|         | CG6454-RB  | 1.23  | 0.99 | Unchanged       |
| CG7766  | CG7766-RA  | 1.40  | 0.05 | Up              |
|         | CG7766-RB  | 0.97  | 0.95 | Unchanged       |
| CG8332  | CG8332-RA  | 1.08  | 0.98 | Unchanged       |
|         | CG8332-RB  | 3.13  | 0.02 | Up              |
| CG8857  | CG8857-RA  | 0.75  | 0.98 | Slightly down   |
|         | CG8857-RB  | 1.64  | 0.02 | Up              |
| CG17077 | CG17077-RB | 1.49  | 0.00 | Up              |
|         | CG17077-RC | 0.86  | 1.00 | Possibly absent |
|         | CG17077-RD | 0.65  | 0.00 | Slightly down   |
| CG31332 | CG31332-RA | 1.15  | 0.51 | Possibly absent |
|         | CG31332-RB | 0.81  | 0.49 | Unchanged       |
|         | CG31332-RC | 0.65  | 0.00 | Unchanged       |
| CG32149 | CG31332-RD | 2.81  | 0.00 | Up              |
|         | CG32149-RA | 0.81  | 0.35 | Possibly absent |
|         | CG32149-RB | 0.61  | 0.14 | Slightly down   |
| CG33261 | CG32149-RC | 1.30  | 0.52 | Up              |
|         | CG33261-RA | 0.00  | 0.00 | Slightly down   |
|         | CG33261-RB | 0.91  | 0.92 | Possibly absent |
|         | CG33261-RC | 0.00  | 0.07 | Possibly absent |
|         | CG33261-RD | 17.48 | 0.00 | Possibly absent |
| CG3671  | CG33261-RE | 0.76  | 0.00 | Possibly absent |
|         | CG33261-RF | 1.68  | 0.00 | Up              |
|         | CG3671-RA  | 0.66  | 0.46 | Unchanged       |
|         | CG3671-RB  | 1.32  | 0.36 | Up              |
| CG4452  | CG3671-RC  | 1.29  | 0.18 | Possibly absent |
|         | CG4452-RA  | 0.82  | 0.70 | Slightly down   |
|         | CG4452-RB  | 1.84  | 0.29 | Up              |
| CG6946  | CG4452-RC  | 0.52  | 0.01 | Slightly down   |
|         | CG6946-RA  | 0.64  | 0.73 | Slightly down   |
|         | CG6946-RB  | 1.03  | 0.00 | Possibly absent |
|         | CG6946-RC  | 3.36  | 0.27 | Up              |
