# Supplementary material for: Genome-Wide Identification of Alternative Splice Forms Down-Regulated by Nonsense-Mediated mRNA Decay in Drosophila
Source: PubMed Central journal article supplement (PMC2689934; doi:10.1371/journal.pgen.1000525), 2009-06-19
Supplement: pgen.1000525.s034.pdf [file pgen.1000525.s034.pdf]

**Table S12. Deconvolution results for the less stringent set of *upf2* affected genes**

| Gene    | Transcript | alpha | beta | Call          |
|---------|------------|-------|------|---------------|
| CG1104  | CG1104-RA  | 1.47  | 0.28 | Up            |
|         | CG1104-RB  | 0.90  | 0.72 | Unchanged     |
| CG1109  | CG1109-RA  | 1.06  | 1.00 | Up            |
|         | CG1109-RB  | 0.61  | 0.00 | Slightly down |
| CG11328 | CG11328-RA | 0.84  | 0.00 | Slightly down |
|         | CG11328-RB | 1.08  | 1.00 | Up            |
| CG11961 | CG11961-RA | 1.01  | 1.00 | Unchanged     |
|         | CG11961-RB | 1.29  | 0.00 | Up            |
| CG12134 | CG12134-RA | 0.64  | 0.89 | Slightly down |
|         | CG12134-RB | 1.72  | 0.11 | Up            |
| CG12864 | CG12864-RA | 1.29  | 0.28 | Up            |
|         | CG12864-RB | 0.92  | 0.72 | Unchanged     |
| CG13900 | CG13900-RA | 2.84  | 0.48 | Up            |
|         | CG13900-RB | 1.04  | 0.52 | Unchanged     |
| CG13923 | CG12022-RA | 1.35  | 0.00 | Up            |
|         | CG13923-RA | 0.98  | 1.00 | Unchanged     |
| CG1546  | CG1546-RA  | 0.97  | 0.96 | Unchanged     |
|         | CG1546-RB  | 1.53  | 0.04 | Up            |
| CG17035 | CG17035-RA | 0.70  | 0.83 | Unchanged     |
|         | CG17035-RB | 2.14  | 0.17 | Up            |
| CG17369 | CG17369-RA | 0.71  | 0.00 | Slightly down |
|         | CG17369-RB | 1.21  | 1.00 | Up            |
| CG1771  | CG1771-RA  | 0.71  | 0.00 | Slightly down |
|         | CG1771-RB  | 1.11  | 1.00 | Up            |
| CG1866  | CG1866-RA  | 1.00  | 0.56 | Unchanged     |
|         | CG1866-RB  | 2.75  | 0.44 | Up            |
| CG2182  | CG2182-RA  | 1.24  | 1.00 | Up            |
|         | CG2182-RB  | 0.54  | 0.00 | Slightly down |
| CG2534  | CG2534-RA  | 1.54  | 0.48 | Up            |
|         | CG2534-RB  | 1.00  | 0.52 | Unchanged     |
| CG31619 | CG31619-RA | 1.34  | 0.34 | Up            |
|         | CG31619-RB | 0.96  | 0.66 | Unchanged     |
| CG32527 | CG32527-RA | 0.73  | 0.00 | Slightly down |
|         | CG32527-RB | 1.59  | 1.00 | Up            |
| CG33103 | CG33103-RA | 1.32  | 0.54 | Up            |
|         | CG33103-RB | 0.73  | 0.46 | Slightly down |
| CG33206 | CG33206-RA | 0.66  | 0.83 | Slightly down |
|         | CG33206-RB | 4.94  | 0.17 | Up            |
| CG3321  | CG3321-RA  | 1.38  | 0.93 | Up            |
|         | CG3321-RB  | 0.59  | 0.07 | Slightly down |
| CG3358  | CG3358-RA  | 1.75  | 0.37 | Up            |
|         | CG3358-RB  | 0.60  | 0.63 | Slightly down |
| CG3629  | CG3629-RA  | 1.12  | 0.98 | Unchanged     |
|         | CG3629-RB  | 3.69  | 0.02 | Up            |
| CG3941  | CG3941-RA  | 1.17  | 1.00 | Up            |
|         | CG3941-RB  | 0.67  | 0.00 | Slightly down |
| CG4062  | CG4062-RA  | 1.12  | 1.00 | Up            |
|         | CG4062-RB  | 0.76  | 0.00 | Slightly down |
| CG4482  | CG4482-RA  | 1.33  | 0.10 | Up            |
|         | CG4482-RB  | 0.87  | 0.90 | Unchanged     |
| CG4879  | CG4879-RA  | 0.64  | 0.31 | Slightly down |
|         | CG4879-RB  | 1.30  | 0.69 | Up            |
| CG5081  | CG5081-RA  | 1.10  | 1.00 | Up            |
|         | CG5081-RB  | 0.74  | 0.00 | Slightly down |
| CG5215  | CG5215-RA  | 3.77  | 0.27 | Up            |
|         | CG5215-RB  | 0.94  | 0.73 | Unchanged     |
| CG5729  | CG5729-RA  | 0.61  | 0.00 | Slightly down |
|         | CG5729-RB  | 3.05  | 1.00 | Up            |
| CG5854  | CG5854-RA  | 1.09  | 1.00 | Unchanged     |
|         | CG5854-RB  | 1.68  | 0.00 | Up            |
| CG5896  | CG5896-RA  | 3.04  | 0.01 | Up            |

Continued on next page

Table S12 – continued from previous page

| Gene    | Transcript | alpha | beta | Call            |
|---------|------------|-------|------|-----------------|
|         | CG5896-RB  | 0.74  | 0.99 | Slightly down   |
| CG6359  | CG6359-RA  | 1.15  | 1.00 | Up              |
|         | CG6359-RB  | 0.65  | 0.00 | Slightly down   |
| CG6454  | CG6454-RA  | 3.35  | 0.01 | Up              |
|         | CG6454-RB  | 1.23  | 0.99 | Unchanged       |
| CG7602  | CG7602-RA  | 0.77  | 0.00 | Slightly down   |
|         | CG7602-RB  | 1.22  | 1.00 | Up              |
| CG7766  | CG7766-RA  | 1.40  | 0.05 | Up              |
|         | CG7766-RB  | 0.97  | 0.95 | Unchanged       |
| CG8332  | CG8332-RA  | 1.08  | 0.98 | Unchanged       |
|         | CG8332-RB  | 3.13  | 0.02 | Up              |
| CG8478  | CG8478-RA  | 0.84  | 1.00 | Slightly down   |
|         | CG8478-RB  | 1.69  | 0.00 | Up              |
| CG8811  | CG8811-RA  | 1.55  | 0.23 | Up              |
|         | CG8811-RB  | 0.88  | 0.77 | Unchanged       |
| CG8857  | CG8857-RA  | 0.75  | 0.98 | Slightly down   |
|         | CG8857-RB  | 1.64  | 0.02 | Up              |
| CG8983  | CG8983-RA  | 1.37  | 1.00 | Up              |
|         | CG8983-RB  | 0.68  | 0.00 | Slightly down   |
| CG9153  | CG9153-RA  | 1.08  | 1.00 | Up              |
|         | CG9153-RB  | 0.58  | 0.00 | Slightly down   |
| CG9354  | CG9354-RA  | 2.80  | 0.02 | Up              |
|         | CG9354-RB  | 0.95  | 0.98 | Unchanged       |
| CG10107 | CG10107-RA | 2.31  | 0.39 | Up              |
|         | CG10107-RB | 0.92  | 0.61 | Unchanged       |
|         | CG10107-RC | 1.18  | 0.00 | Possibly absent |
| CG10772 | CG10772-RA | 1.33  | 0.75 | Possibly absent |
|         | CG10772-RB | 0.99  | 0.00 | Possibly absent |
|         | CG10772-RC | 0.96  | 0.00 | Possibly absent |
|         | CG10772-RD | 0.88  | 0.25 | Possibly absent |
|         | CG10772-RE | 1.54  | 0.00 | Up              |
|         | CG10772-RF | 0.70  | 0.00 | Slightly down   |
| CG14025 | CG14025-RA | 1.03  | 0.00 | Possibly absent |
|         | CG14025-RB | 1.73  | 0.40 | Up              |
|         | CG14025-RC | 0.84  | 0.60 | Unchanged       |
| CG14414 | CG14414-RA | 1.69  | 0.61 | Up              |
|         | CG14414-RB | 0.75  | 0.39 | Slightly down   |
|         | CG14414-RC | 0.83  | 0.00 | Possibly absent |
| CG1447  | CG1447-RA  | 0.92  | 0.00 | Possibly absent |
|         | CG1447-RB  | 0.82  | 0.77 | Slightly down   |
|         | CG1447-RC  | 1.25  | 0.23 | Up              |
| CG14792 | CG14792-RA | 1.99  | 0.07 | Up              |
|         | CG14792-RB | 0.66  | 0.93 | Slightly down   |
|         | CG14792-RD | 1.26  | 0.00 | Possibly absent |
| CG14823 | CG14823-RA | 0.71  | 0.00 | Possibly absent |
|         | CG14823-RB | 0.00  | 0.19 | Slightly down   |
|         | CG14823-RC | 1.54  | 0.23 | Up              |
|         | CG14823-RD | 0.98  | 0.59 | Possibly absent |
| CG15086 | CG15086-RA | 1.00  | 0.62 | Unchanged       |
|         | CG15086-RB | 0.97  | 0.00 | Possibly absent |
|         | CG15086-RC | 0.72  | 0.38 | Possibly absent |
|         | CG15086-RD | 1.56  | 0.00 | Up              |
| CG1651  | CG1651-RA  | 0.80  | 0.03 | Possibly absent |
|         | CG1651-RB  | 0.53  | 0.00 | Slightly down   |
|         | CG1651-RC  | 1.20  | 0.97 | Up              |
|         | CG1651-RD  | 0.77  | 0.00 | Possibly absent |
| CG17077 | CG17077-RB | 1.49  | 0.00 | Up              |
|         | CG17077-RC | 0.86  | 1.00 | Slightly down   |
|         | CG17077-RD | 0.65  | 0.00 | Slightly down   |
| CG17299 | CG17299-RA | 1.32  | 0.19 | Up              |
|         | CG17299-RB | 0.72  | 0.00 | Slightly down   |

Continued on next page

Table S12 – continued from previous page

| Gene    | Transcript | alpha | beta | Call            |
|---------|------------|-------|------|-----------------|
|         | CG17299-RC | 0.80  | 0.00 | Possibly absent |
|         | CG17299-RD | 0.71  | 0.01 | Slightly down   |
|         | CG17299-RE | 1.16  | 0.62 | Up              |
|         | CG17299-RF | 0.92  | 0.17 | Possibly absent |
|         | CG17299-RG | 1.36  | 0.01 | Up              |
|         | CG17299-RH | 0.94  | 0.00 | Possibly absent |
| CG17952 | CG17952-RA | 0.70  | 0.05 | Possibly absent |
|         | CG17952-RB | 0.76  | 0.94 | Slightly down   |
|         | CG17952-RC | 1.90  | 0.01 | Up              |
| CG18660 | CG18660-RA | 1.07  | 0.59 | Possibly absent |
|         | CG18660-RB | 0.00  | 0.18 | Slightly down   |
|         | CG18660-RC | 1.36  | 0.23 | Up              |
| CG2040  | CG2040-RA  | 0.97  | 0.88 | Possibly absent |
|         | CG2040-RB  | 0.76  | 0.12 | Unchanged       |
|         | CG2040-RC  | 1.93  | 0.00 | Up              |
| CG2098  | CG2098-RA  | 0.00  | 0.02 | Slightly down   |
|         | CG2098-RB  | 1.14  | 0.93 | Up              |
|         | CG2098-RC  | 1.17  | 0.05 | Possibly absent |
| CG2168  | CG2168-RA  | 1.18  | 0.75 | Up              |
|         | CG2168-RB  | 0.94  | 0.13 | Possibly absent |
|         | CG2168-RD  | 0.71  | 0.12 | Slightly down   |
| CG31137 | CG31137-RA | 0.84  | 0.00 | Possibly absent |
|         | CG31137-RB | 1.13  | 1.00 | Up              |
|         | CG31137-RC | 0.86  | 0.00 | Possibly absent |
|         | CG31137-RD | 0.99  | 0.00 | Possibly absent |
|         | CG31137-RE | 1.13  | 0.00 | Possibly absent |
|         | CG31137-RF | 0.76  | 0.00 | Slightly down   |
| CG31363 | CG31363-RA | 1.09  | 0.60 | Possibly absent |
|         | CG31363-RB | 0.94  | 0.01 | Possibly absent |
|         | CG31363-RC | 0.97  | 0.00 | Unchanged       |
|         | CG31363-RD | 2.07  | 0.30 | Up              |
|         | CG31363-RE | 0.63  | 0.00 | Slightly down   |
|         | CG31363-RH | 0.92  | 0.09 | Possibly absent |
| CG32103 | CG32103-RA | 0.71  | 0.00 | Slightly down   |
|         | CG32103-RB | 1.26  | 0.01 | Up              |
|         | CG32103-RC | 0.95  | 0.99 | Unchanged       |
| CG32149 | CG32149-RA | 0.81  | 0.35 | Possibly absent |
|         | CG32149-RB | 0.61  | 0.14 | Slightly down   |
|         | CG32149-RC | 1.30  | 0.52 | Up              |
| CG32858 | CG32858-RA | 2.10  | 0.00 | Up              |
|         | CG32858-RB | 0.97  | 1.00 | Unchanged       |
|         | CG32858-RC | 1.06  | 0.00 | Possibly absent |
| CG33045 | CG33045-RA | 0.82  | 0.00 | Possibly absent |
|         | CG33045-RC | 1.16  | 0.00 | Possibly absent |
|         | CG33045-RD | 0.97  | 0.16 | Possibly absent |
|         | CG33045-RE | 3.93  | 0.11 | Up              |
|         | CG33045-RF | 0.53  | 0.00 | Possibly absent |
|         | CG33045-RG | 0.74  | 0.74 | Slightly down   |
| CG33129 | CG33129-RA | 0.40  | 0.00 | Slightly down   |
|         | CG33129-RB | 0.47  | 0.50 | Slightly down   |
|         | CG33129-RC | 0.58  | 0.38 | Slightly down   |
|         | CG33129-RE | 1.18  | 0.12 | Up              |
| CG33261 | CG33261-RA | 0.00  | 0.00 | Slightly down   |
|         | CG33261-RB | 0.91  | 0.92 | Possibly absent |
|         | CG33261-RC | 0.00  | 0.07 | Possibly absent |
|         | CG33261-RD | 17.48 | 0.00 | Possibly absent |
|         | CG33261-RE | 0.76  | 0.00 | Possibly absent |
|         | CG33261-RF | 1.68  | 0.00 | Up              |
| CG3413  | CG3413-RA  | 1.18  | 0.78 | Possibly absent |
|         | CG3413-RB  | 1.37  | 0.12 | Up              |
|         | CG3413-RC  | 1.03  | 0.00 | Possibly absent |

Continued on next page

Table S12 – continued from previous page

| Gene   | Transcript | alpha     | beta | Call            |           |
|--------|------------|-----------|------|-----------------|-----------|
| CG3671 | CG3413-RD  | 0.73      | 0.09 | Slightly down   |           |
|        | CG3671-RA  | 0.66      | 0.46 | Slightly down   |           |
|        | CG3671-RB  | 1.32      | 0.36 | Up              |           |
| CG3777 | CG3671-RC  | 1.29      | 0.18 | Up              |           |
|        | CG3777-RA  | 0.99      | 0.91 | Unchanged       |           |
|        | CG3777-RB  | 0.85      | 0.09 | Possibly absent |           |
| CG4376 | CG3777-RC  | 1.78      | 0.00 | Up              |           |
|        | CG4376-RA  | 1.09      | 0.78 | Unchanged       |           |
|        | CG4376-RB  | 1.75      | 0.22 | Up              |           |
| CG4452 | CG4376-RC  | 1.06      | 0.00 | Possibly absent |           |
|        | CG4452-RA  | 0.82      | 0.70 | Slightly down   |           |
|        | CG4452-RB  | 1.84      | 0.29 | Up              |           |
| CG4898 | CG4452-RC  | 0.52      | 0.01 | Slightly down   |           |
|        | CG4898-RA  | 1.17      | 0.79 | Up              |           |
|        | CG4898-RB  | 0.51      | 0.00 | Slightly down   |           |
|        | CG4898-RC  | 0.97      | 0.00 | Possibly absent |           |
|        | CG4898-RD  | 1.24      | 0.00 | Possibly absent |           |
|        | CG4898-RE  | 0.93      | 0.00 | Possibly absent |           |
|        | CG4898-RF  | 0.81      | 0.01 | Possibly absent |           |
|        | CG4898-RH  | 1.35      | 0.17 | Up              |           |
|        | CG4898-RI  | 0.65      | 0.02 | Possibly absent |           |
|        | CG4898-RJ  | 0.87      | 0.00 | Possibly absent |           |
|        | CG4898-RK  | 0.91      | 0.00 | Possibly absent |           |
|        | CG4898-RL  | 2.05      | 0.00 | Possibly absent |           |
|        | CG6143     | CG6143-RA | 2.48 | 0.27            | Up        |
|        |            | CG6143-RB | 1.40 | 0.00            | Up        |
|        |            | CG6143-RC | 0.95 | 0.73            | Unchanged |
| CG6391 | CG6391-RA  | 0.44      | 0.24 | Slightly down   |           |
|        | CG6391-RB  | 1.42      | 0.65 | Up              |           |
|        | CG6391-RC  | 0.86      | 0.11 | Possibly absent |           |
| CG6835 | CG6835-RA  | 1.17      | 0.43 | Possibly absent |           |
|        | CG6835-RC  | 1.60      | 0.24 | Up              |           |
|        | CG6835-RD  | 0.00      | 0.33 | Slightly down   |           |
| CG6946 | CG6946-RA  | 0.64      | 0.73 | Slightly down   |           |
|        | CG6946-RB  | 1.03      | 0.00 | Possibly absent |           |
|        | CG6946-RC  | 3.36      | 0.27 | Up              |           |
| CG7283 | CG7283-RA  | 1.67      | 0.90 | Unchanged       |           |
|        | CG7283-RB  | 4.33      | 0.10 | Up              |           |
|        | CG7283-RC  | 0.87      | 0.00 | Possibly absent |           |
| CG7852 | CG7852-RA  | 1.43      | 1.00 | Unchanged       |           |
|        | CG7852-RB  | 1.12      | 0.00 | Possibly absent |           |
|        | CG7852-RC  | 1.96      | 0.00 | Up              |           |
| CG8291 | CG8291-RA  | 1.22      | 0.98 | Up              |           |
|        | CG8291-RB  | 0.69      | 0.02 | Slightly down   |           |
|        | CG8291-RC  | 0.96      | 0.00 | Possibly absent |           |
| CG8874 | CG8874-RA  | 0.78      | 0.00 | Possibly absent |           |
|        | CG8874-RB  | 1.53      | 0.03 | Up              |           |
|        | CG8874-RC  | 1.24      | 0.00 | Possibly absent |           |
|        | CG8874-RD  | 1.28      | 0.96 | Unchanged       |           |
| CG8920 | CG8920-RA  | 1.30      | 1.00 | Up              |           |
|        | CG8920-RB  | 0.59      | 0.00 | Slightly down   |           |
|        | CG8920-RC  | 1.01      | 0.00 | Unchanged       |           |
