# Supplementary material for: Genome-Wide Identification of Alternative Splice Forms Down-Regulated by Nonsense-Mediated mRNA Decay in Drosophila
Source: PLoS Genet. 2009 Jun 19;5(6):e1000525. doi: 10.1371/journal.pgen.1000525 (PMC2689934; doi:10.1371/journal.pgen.1000525)
Supplement: Table S2 — Number of introns in 5′ UTR. As Table S1, but for the feature “number of introns in 5′ UTR.” (0.03 MB PDF) [file pgen.1000525.s024.pdf]

**Table S2. Number of introns in 5' UTR**

| (a) Stringent set |            |               | (b) Less stringent set |            |               | (c) Stringent set |    |   |   |   |
|-------------------|------------|---------------|------------------------|------------|---------------|-------------------|----|---|---|---|
| value             | NMD target | NMD nontarget | value                  | NMD target | NMD nontarget | NMD nontarget     |    |   |   |   |
| 0                 | 28         | 30            | 0                      | 133        | 142           | 0                 | 20 | 1 | 6 | 1 |
| 1                 | 12         | 12            | 1                      | 57         | 47            | 1                 | 7  | 0 | 5 | 0 |
| 2                 | 1          | 2             | 2                      | 6          | 7             | 2                 | 0  | 0 | 0 | 1 |
|                   |            |               | 3                      | 2          | 2             |                   |    |   |   |   |

| (d) Less stringent set |     |      |     |      |    |   |   |
|------------------------|-----|------|-----|------|----|---|---|
| NMD nontarget          |     |      |     |      |    |   |   |
|                        | 0   | 0.25 | 0.5 | 0.67 | 1  | 2 | 3 |
| 0                      | 100 | 1    | 2   | 0    | 15 | 3 | 1 |
| 0.5                    | 3   | 0    | 0   | 0    | 0  | 0 | 0 |
| 0.67                   | 0   | 0    | 0   | 0    | 2  | 0 | 0 |
| 1                      | 21  | 0    | 1   | 1    | 22 | 1 | 0 |
| 2                      | 2   | 0    | 0   | 0    | 1  | 2 | 1 |
| 3                      | 1   | 0    | 0   | 0    | 0  | 1 | 0 |

As Table S1, but for the feature “number of introns in 5' UTR.”
