# Supplementary material for: Genome-Wide Identification of Alternative Splice Forms Down-Regulated by Nonsense-Mediated mRNA Decay in Drosophila
Source: PLoS Genet. 2009 Jun 19;5(6):e1000525. doi: 10.1371/journal.pgen.1000525 (PMC2689934; doi:10.1371/journal.pgen.1000525)
Supplement: Table S4 — GO terms enriched in less stringent upf1 set. (0.03 MB PDF) [file pgen.1000525.s026.pdf]

**Table S4. GO terms enriched in less stringent *upf1* set**

| GO Term                                       | P-value | Genes                                |
|-----------------------------------------------|---------|--------------------------------------|
| Biological Process                            |         |                                      |
| GO:0045807 positive regulation of endocytosis | 0.0046  | Syx7 Nedd4                           |
| Molecular Function                            |         |                                      |
| GO:0016409 palmitoyltransferase activity      | 0.0046  | CPTI Spt-I                           |
| GO:0043169 cation binding                     | 0.0056  | Actn Fer1HCH Tace ap Nrg Cpn CG10126 |
| GO:0046872 metal ion binding                  | 0.0066  | Actn Fer1HCH Tace ap Nrg Cpn CG10126 |
| GO:0043167 ion binding                        | 0.0066  | Actn Fer1HCH Tace ap Nrg Cpn CG10126 |
