# Supplementary material for: Genome-Wide Identification of Alternative Splice Forms Down-Regulated by Nonsense-Mediated mRNA Decay in Drosophila
Source: PLoS Genet. 2009 Jun 19;5(6):e1000525. doi: 10.1371/journal.pgen.1000525 (PMC2689934; doi:10.1371/journal.pgen.1000525)
Supplement: Table S8 — upf2 target genes, less stringent set. (0.04 MB PDF) [file pgen.1000525.s030.pdf]

**Table S8. *upf2* target genes, less stringent set**

| gene ID | name         | transcript | NMD status |
|---------|--------------|------------|------------|
| CG1104  |              | CG1104-RA  | target     |
|         |              | CG1104-RB  | nontarget  |
| CG1109  |              | CG1109-RA  | target     |
|         |              | CG1109-RB  | nontarget  |
| CG11328 | Nhe3         | CG11328-RB | target     |
|         |              | CG11328-RA | nontarget  |
| CG11961 |              | CG11961-RB | target     |
|         |              | CG11961-RA | nontarget  |
| CG12134 |              | CG12134-RB | target     |
|         |              | CG12134-RA | nontarget  |
| CG12864 | Su(var)2-HP2 | CG12864-RA | target     |
|         |              | CG12864-RB | nontarget  |
| CG13900 |              | CG13900-RA | target     |
|         |              | CG13900-RB | nontarget  |
| CG13923 |              | CG12022-RA | target     |
|         |              | CG13923-RA | nontarget  |
| CG1546  | PH4alphaSG2  | CG1546-RB  | target     |
|         |              | CG1546-RA  | nontarget  |
| CG17035 | GXIVsPLA2    | CG17035-RB | target     |
|         |              | CG17035-RA | nontarget  |
| CG17369 | Vha55        | CG17369-RB | target     |
|         |              | CG17369-RA | nontarget  |
| CG1771  | mew          | CG1771-RB  | target     |
|         |              | CG1771-RA  | nontarget  |
| CG1866  | Moca-cyp     | CG1866-RB  | target     |
|         |              | CG1866-RA  | nontarget  |
| CG2182  |              | CG2182-RA  | target     |
|         |              | CG2182-RB  | nontarget  |
| CG2534  | cno          | CG2534-RA  | target     |
|         |              | CG2534-RB  | nontarget  |
| CG31619 |              | CG31619-RA | target     |
|         |              | CG31619-RB | nontarget  |
| CG32527 |              | CG32527-RB | target     |
|         |              | CG32527-RA | nontarget  |
| CG33103 | Ppn          | CG33103-RA | target     |
|         |              | CG33103-RB | nontarget  |
| CG33206 | l(1)G0168    | CG33206-RB | target     |
|         |              | CG33206-RA | nontarget  |
| CG3321  |              | CG3321-RA  | target     |
|         |              | CG3321-RB  | nontarget  |
| CG3358  |              | CG3358-RA  | target     |
|         |              | CG3358-RB  | nontarget  |
| CG3629  | Dll          | CG3629-RB  | target     |
|         |              | CG3629-RA  | nontarget  |
| CG3941  | pita         | CG3941-RA  | target     |
|         |              | CG3941-RB  | nontarget  |
| CG4062  | Aats-val     | CG4062-RA  | target     |
|         |              | CG4062-RB  | nontarget  |
| CG4482  | mol          | CG4482-RA  | target     |
|         |              | CG4482-RB  | nontarget  |
| CG4879  | RecQ5        | CG4879-RB  | target     |
|         |              | CG4879-RA  | nontarget  |
| CG5081  | Syx7         | CG5081-RA  | target     |
|         |              | CG5081-RB  | nontarget  |
| CG5215  | Zn72D        | CG5215-RA  | target     |
|         |              | CG5215-RB  | nontarget  |
| CG5729  | Dgp-1        | CG5729-RB  | target     |
|         |              | CG5729-RA  | nontarget  |
| CG5854  |              | CG5854-RB  | target     |
|         |              | CG5854-RA  | nontarget  |
| CG5896  | grass        | CG5896-RA  | target     |

Continued on next page

Table S8 – continued from previous page

| gene ID | name        | transcript | NMD status      |
|---------|-------------|------------|-----------------|
| CG6359  |             | CG5896-RB  | nontarget       |
|         |             | CG6359-RA  | target          |
|         |             | CG6359-RB  | nontarget       |
| CG6454  |             | CG6454-RA  | target          |
|         |             | CG6454-RB  | nontarget       |
|         |             |            |                 |
| CG7602  | DNApol-iota | CG7602-RB  | target          |
|         |             | CG7602-RA  | nontarget       |
|         |             |            |                 |
| CG7766  |             | CG7766-RA  | target          |
|         |             | CG7766-RB  | nontarget       |
|         |             |            |                 |
| CG8332  | RpS15       | CG8332-RB  | target          |
|         |             | CG8332-RA  | nontarget       |
|         |             |            |                 |
| CG8478  |             | CG8478-RB  | target          |
|         |             | CG8478-RA  | nontarget       |
|         |             |            |                 |
| CG8811  | muskelin    | CG8811-RA  | target          |
|         |             | CG8811-RB  | nontarget       |
|         |             |            |                 |
| CG8857  | RpS11       | CG8857-RB  | target          |
|         |             | CG8857-RA  | nontarget       |
|         |             |            |                 |
| CG8983  | ERp60       | CG8983-RA  | target          |
|         |             | CG8983-RB  | nontarget       |
|         |             |            |                 |
| CG9153  |             | CG9153-RA  | target          |
|         |             | CG9153-RB  | nontarget       |
|         |             |            |                 |
| CG9354  | RpL34b      | CG9354-RA  | target          |
|         |             | CG9354-RB  | nontarget       |
|         |             |            |                 |
| CG10107 |             | CG10107-RA | target          |
|         |             | CG10107-RB | nontarget       |
|         |             |            |                 |
| CG10772 | Fur1        | CG10107-RC | possibly absent |
|         |             | CG10772-RE | target          |
|         |             | CG10772-RF | nontarget       |
| CG14025 | Bsg25D      | CG10772-RA | possibly absent |
|         |             | CG10772-RB | possibly absent |
|         |             | CG10772-RC | possibly absent |
| CG14414 |             | CG10772-RD | possibly absent |
|         |             | CG14025-RB | target          |
|         |             | CG14025-RC | nontarget       |
| CG1447  | Ptx1        | CG14025-RA | possibly absent |
|         |             | CG14414-RA | target          |
|         |             | CG14414-RB | nontarget       |
| CG14792 | sta         | CG14414-RC | possibly absent |
|         |             | CG1447-RC  | target          |
|         |             | CG1447-RB  | nontarget       |
| CG14823 |             | CG1447-RA  | possibly absent |
|         |             | CG14792-RA | target          |
|         |             | CG14792-RB | nontarget       |
| CG15086 |             | CG14792-RD | possibly absent |
|         |             | CG14823-RC | target          |
|         |             | CG14823-RB | nontarget       |
| CG1651  | Ank         | CG14823-RA | possibly absent |
|         |             | CG14823-RD | possibly absent |
|         |             | CG15086-RD | target          |
| CG17077 | pnt         | CG15086-RA | nontarget       |
|         |             | CG15086-RB | possibly absent |
|         |             | CG15086-RC | possibly absent |
| CG17299 | SNF4Agamma  | CG1651-RC  | target          |
|         |             | CG1651-RB  | nontarget       |
|         |             | CG1651-RA  | possibly absent |
|         |             | CG1651-RD  | possibly absent |
|         |             | CG17077-RB | target          |
|         |             | CG17077-RC | nontarget       |
|         |             | CG17077-RD | nontarget       |
|         |             | CG17299-RA | target          |
|         |             | CG17299-RE | target          |

Continued on next page

Table S8 – continued from previous page

| gene ID | name           | transcript | NMD status      |
|---------|----------------|------------|-----------------|
| CG17952 | LBR            | CG17299-RG | target          |
|         |                | CG17299-RB | nontarget       |
|         |                | CG17299-RD | nontarget       |
|         |                | CG17299-RC | possibly absent |
|         |                | CG17299-RF | possibly absent |
|         |                | CG17299-RH | possibly absent |
| CG17952 | LBR            | CG17952-RC | target          |
|         |                | CG17952-RB | nontarget       |
|         |                | CG17952-RA | possibly absent |
| CG18660 | Nckx30C        | CG18660-RC | target          |
|         |                | CG18660-RB | nontarget       |
|         |                | CG18660-RA | possibly absent |
| CG2040  | hig            | CG2040-RC  | target          |
|         |                | CG2040-RB  | nontarget       |
|         |                | CG2040-RA  | possibly absent |
| CG2098  | ferrochelatase | CG2098-RB  | target          |
|         |                | CG2098-RA  | nontarget       |
|         |                | CG2098-RC  | possibly absent |
| CG2168  | RpS3A          | CG2168-RA  | target          |
|         |                | CG2168-RD  | nontarget       |
|         |                | CG2168-RB  | possibly absent |
| CG31137 | twin           | CG31137-RB | target          |
|         |                | CG31137-RF | nontarget       |
|         |                | CG31137-RA | possibly absent |
|         |                | CG31137-RC | possibly absent |
|         |                | CG31137-RD | possibly absent |
| CG31363 | Jupiter        | CG31137-RE | possibly absent |
|         |                | CG31363-RD | target          |
|         |                | CG31363-RC | nontarget       |
|         |                | CG31363-RE | nontarget       |
|         |                | CG31363-RA | possibly absent |
| CG32103 |                | CG31363-RB | possibly absent |
|         |                | CG31363-RH | possibly absent |
|         |                | CG32103-RB | target          |
|         |                | CG32103-RA | nontarget       |
|         |                | CG32103-RC | nontarget       |
| CG32149 | RhoGAP71E      | CG32149-RC | target          |
|         |                | CG32149-RB | nontarget       |
|         |                | CG32149-RA | possibly absent |
| CG32858 | sn             | CG32858-RA | target          |
|         |                | CG32858-RB | nontarget       |
|         |                | CG32858-RC | possibly absent |
| CG33045 |                | CG33045-RE | target          |
|         |                | CG33045-RG | nontarget       |
|         |                | CG33045-RA | possibly absent |
|         |                | CG33045-RC | possibly absent |
|         |                | CG33045-RD | possibly absent |
| CG33129 |                | CG33045-RF | possibly absent |
|         |                | CG33129-RE | target          |
|         |                | CG33129-RA | nontarget       |
|         |                | CG33129-RB | nontarget       |
|         |                | CG33129-RC | nontarget       |
| CG33261 | Trl            | CG33261-RF | target          |
|         |                | CG33261-RA | nontarget       |
|         |                | CG33261-RB | possibly absent |
|         |                | CG33261-RC | possibly absent |
|         |                | CG33261-RD | possibly absent |
| CG3413  | wdp            | CG33261-RE | possibly absent |
|         |                | CG3413-RB  | target          |
|         |                | CG3413-RD  | nontarget       |
|         |                | CG3413-RA  | possibly absent |

Continued on next page

Table S8 – continued from previous page

| gene ID | name    | transcript | NMD status      |
|---------|---------|------------|-----------------|
| CG3671  | Mvl     | CG3413-RC  | possibly absent |
|         |         | CG3671-RB  | target          |
|         |         | CG3671-RC  | target          |
|         |         | CG3671-RA  | nontarget       |
| CG3777  |         | CG3777-RC  | target          |
|         |         | CG3777-RA  | nontarget       |
|         |         | CG3777-RB  | possibly absent |
|         |         | CG4376-RB  | target          |
| CG4376  | Actn    | CG4376-RA  | nontarget       |
|         |         | CG4376-RC  | possibly absent |
|         |         | CG4452-RB  | target          |
|         |         | CG4452-RA  | nontarget       |
| CG4452  |         | CG4452-RC  | nontarget       |
|         |         | CG4898-RA  | target          |
|         |         | CG4898-RH  | target          |
|         |         | CG4898-RB  | nontarget       |
| CG4898  | Tm1     | CG4898-RC  | possibly absent |
|         |         | CG4898-RD  | possibly absent |
|         |         | CG4898-RE  | possibly absent |
|         |         | CG4898-RF  | possibly absent |
|         |         | CG4898-RI  | possibly absent |
|         |         | CG4898-RJ  | possibly absent |
|         |         | CG4898-RK  | possibly absent |
|         |         | CG4898-RL  | possibly absent |
|         |         | CG6143-RA  | target          |
|         |         | CG6143-RB  | target          |
|         |         | CG6143-RC  | nontarget       |
|         |         | CG6391-RB  | target          |
| CG6391  | Aps     | CG6391-RA  | nontarget       |
|         |         | CG6391-RC  | possibly absent |
|         |         | CG6835-RC  | target          |
| CG6835  | GS      | CG6835-RD  | nontarget       |
|         |         | CG6835-RA  | possibly absent |
|         |         | CG6946-RC  | target          |
| CG6946  | glo     | CG6946-RA  | nontarget       |
|         |         | CG6946-RB  | possibly absent |
|         |         | CG7283-RB  | target          |
| CG7283  | RpL10Ab | CG7283-RA  | nontarget       |
|         |         | CG7283-RC  | possibly absent |
|         |         | CG7852-RC  | target          |
| CG7852  |         | CG7852-RA  | nontarget       |
|         |         | CG7852-RB  | possibly absent |
|         |         | CG8291-RA  | target          |
| CG8291  |         | CG8291-RB  | nontarget       |
|         |         | CG8291-RC  | possibly absent |
|         |         | CG8874-RB  | target          |
| CG8874  | Fps85D  | CG8874-RD  | nontarget       |
|         |         | CG8874-RA  | possibly absent |
|         |         | CG8874-RC  | possibly absent |
| CG8920  |         | CG8920-RA  | target          |
|         |         | CG8920-RB  | nontarget       |
|         |         | CG8920-RC  | nontarget       |
